# Supplementary material for: A Scoping Review of Observational Studies Examining Relationships between Environmental Behaviors and Health Behaviors
Source: PubMed Central journal article supplement (PMC4454941; doi:10.3390/ijerph120504833), 2015-05-05
Supplement: ijerph-12-04833-s001.pdf [file ijerph-12-04833-s001.pdf]

# A Scoping Review of Observational Studies Examining Relationships between Environmental Behaviors and Health Behaviors

---

## Search strategy

**Via OVID: PsychInfo (1967 to January Week 1 2014), (N = 1,547), Medline (1946 to November Week 3 2013), (N = 6,933), Medline in process (searched on 8 January, 2014), (N = 1,291), EconLit (1886 to December 2013 (N = 1875)**

1. behavio#r\$.mp.
2. (habit or habits).mp.
3. (behavior/ or habits/ or health behavior/ or risk reduction behavior/)
4. life style.mp.
5. lifestyle.mp.
6. 1 OR 2 OR 3 OR 4 OR 5
7. (ecological\$ adj4 behavio#r\$).mp.
8. (climate change adj4 behavio#r\$).mp.
9. (pro-environmental\$ adj4 behavio#r\$).mp.
10. (proenvironmental\$ adj4 behavio#r\$).mp.
11. green\$ behavio#r\$.mp.
12. green\$ consumerism.mp.
13. act environmentally.mp.
14. sustainable lifestyle.mp.
15. sustainable living.mp.
16. sustainable behavio#r\$.mp.
17. climate change.mp.
18. global warming.mp.
19. greenhouse effect.mp.
20. carbon footprint.mp.
21. ecological footprint.mp.
22. (eco-friendly or environmental friendliness).mp.
23. climate change.mp.
24. global warming.mp.
25. greenhouse effect.mp.
26. environmental\$ concern\$.mp.
27. ecological\$ concern\$.mp.
28. environmental\$ conscious.mp.
29. conservation of energy resources.mp.
30. conservation of natural resources.mp
31. environmental\$ concern\$.mp.
32. environmental impact\$.mp.
33. sustainable agriculture.mp.
34. (environmental\$ adj4 behavio#r\$).mp.
35. 7 OR 8 OR 9 OR 10 OR 11 OR 12 OR 13 OR 14 OR 15 OR 16 OR 17 OR 18 OR 19 OR 20 OR 21 OR 22 OR 23 OR 24 OR 25 OR 26 OR 27 OR 28 OR 29 OR 30 OR 31 OR 32 OR 33 OR 34
36. 6 AND 35

37. food preferences.mp.
38. (food habits/ or food choice/)
39. (diet\$ quality or healthy eating or diet\$ patterns).mp.
40. smoking
41. smoker
42. smokers
43. smok\$ adj15 tobacco
44. smok\$ adj15 cigarett\$
45. smok\$ adj15 hookah
46. ((drug\* adj3 abus\*) or (drug\* adj3 addict\*) or (drug\* adj3 depend\*)).mp.
47. polydrug\*.mp.
48. substance\*.mp.
49. alcohol\*.mp.
50. tranquil\*.mp.
51. ((chemical\* adj3 abus\*) or (chemical\* adj3 addict\*) or (chemical\* adj3 depend\*)).mp.
52. narcotic\*.mp.
53. opiate\*.mp.
54. street drug\*.mp.
55. solvent\*.mp.
56. inhalant\*.mp.
57. psychotropic\*.mp.
58. intoxica\*.mp.
59. 46 OR 47 OR 48 OR 49 OR 50 OR 51 OR 52 OR 53 OR 54 OR 55 OR 56 OR 57 OR 58
60. abus\*.mp.
61. use\*.mp.
62. misus\*.mp.
63. usin\*.mp.
64. utiliz\*.mp.
65. utilis\*.mp.
66. depend\*.mp.
67. addict\*.mp.
68. illegal\*.mp.
69. illicit\*.mp.
70. habit\*.mp.
71. withdraw\*.mp.
72. behave\*.mp.
73. abstinence\*.mp.
74. abstain\*.mp.
75. rehab\*.mp.
76. intoxica\*.mp.
77. non-prescri\*.mp.
78. 60 OR 61 OR 62 OR 63 OR 64 OR 65 OR 66 OR 67 OR 68 OR 69 OR 70 OR 71 OR 72 OR 73 OR 74 OR 75 OR 76 OR 77
79. 59 AND 78
80. dual\* adj diagnos\*
81. exp substance-abuse/
82. exp drug-dependence /
83. exp alcohol-abuse /
84. exp alcoholism /
85. 37 OR 38 OR 39 OR 40 OR 41 OR 42 OR 43 OR 44 OR 45 OR 79 OR 80 OR 81 OR 82 OR 83 OR 84

86. exercise.tw.  
 87. physical activity.tw.  
 88. exertion.tw.  
 89. physical fitness.tw.  
 90. walking.tw.  
 91. (walk\$ or cyclist\$ or bicycl\$ or bik\$).mp.  
 92. 85 OR 86 OR 87 OR 88 OR 90 or 91  
 93. ((sav\$ adj3 energy) or (sav\$ adj3 water) or (sav\$ adj3 electricity) or (energy adj3 efficien\$) or energy conservation or energy consumption or low energy or low carbon or carbon footprint or carbon friendly or water conservation or water saving or wastewater reuse or household waste or domestic waste or household waste management or waste separation or reduc\$ waste or reduc\$ pack\$ or organic food or organically grown or local food or locally grown or ecological consumption or food production practices or food related lifestyle or food waste or plate waste or food miles or public transport\$ or (allotment adj10 vegetable\$) or (allotment adj10 fruit) or (allotment adj10 bees)).mp.  
 94. recycling.ti,ab.  
 95. 93 or 94  
 96. (travel plan\$ or transport plan\$ or safe route\$ or safer route\$ or walking school bus\$ or walking bus\$ or ecological commut\$ or ecological transport\$ or mobility management plan\$ or travel to work or commuter plan\$ or travelsmart or walk to school).mp.  
 97. (Travel behaviour chang\$ or travel behavior chang\$).mp.  
 98. ((modal or mode) and (choice\$ or distribution\$ or selection\$ or shift\$ or split\$ or substitut\$ or switch\$ or transfer\$ or use\$ or chang\$ or modif\$)).mp.  
 99. (travel\$ or transportation\$).tw. or transportation/  
 100. 98 AND 99  
 101. (Automobile\$ or auto use\$ or car or cars or mechani#ed transport\$ or motori#ed transport\$ or motorist\$ or personal transport\$ or road use\$ or motor vehic\$ or vkt\$ or vmt\$ or vehicle kilomet\$ or vehicle mile\$ or (driv\$ adj5 (school\$ or work\$))).mp. or motor vehicles/  
 102. (walk\$ or (cyclist\$ or cycling or bicycl\$ or bik\$) or (bus or buses or busing or bussing or (train or trains or rail or railway) or public transport\$) or (carshar\$ or carpool\$ or (car\$ adj shar\$) or (car\$ adj pool\$)) or (non-auto\$ or non-motori#ed) or (telework\$ or telecommut\$)).mp. or walking/ or bicycling/  
 103. 101 and 102  
 104. (active commut\$ or active travel\$ or utilitarian walk\$ or utilitarian cycl\$ or green travel\$ or greener travel\$ or green transport\$ or greener transport\$ or ecological commut\$ or ecological transport\$ or ecotravel\$ or ecotransport\$ or ecocommut\$).tw. or (active transport\$.tw. not exp biological transport/ not exp carrier proteins/  
 105. 103 or 104  
 106. 96 or 97 or 100 or 105  
 107. 95 or 36  
 108. 92 AND 107  
 109. 106 OR 108

### **BIOSIS via Web of Science 1969 to 03-01-2014, (N=10,302)**

Limited to document types = article, taxa notes = humans language = English. Final set refined to OECD countries.

1. ((TI=( behavio\*) OR TS=( behavio\*) OR TI=( habit OR habits) OR TS=( habit OR habits ) OR TI=(behavio\* OR habits OR “health behavio\*” OR “risk reduction behavio\*”) OR TS=(behavio\* OR habits OR “health behavio\*” OR “risk reduction behavio\*”) OR TI=( life style ) OR TS=( life style) OR TI=( lifestyle ) OR TS=( lifestyle)) NOT TS=(“ in vitro”) NOT TI=(“in vitro”) NOT TS=(“ in vivo”) NOT TI=( “in vivo”) NOT TS=(“organic acids”) NOT TI=(“organic acids”) NOT TS=(membrane) NOT TI=(membrane) NOT TS=(cell) NOT

TI=(cell) NOT TS=(cells) NOT TI=(cells) NOT TS=(cellular) NOT TI=(cellular) NOT TS=(mice) NOT TI=(mice) NOT TS=(rats) NOT TI=(rats) NOT TS=(rat) NOT TI=(rat) NOT TS=(mouse) NOT TI=(mouse))

2. ((TI=(environmental\* NEAR/4 behavio\*) OR TI=( ecological NEAR/4 behavio\*) OR TI=(“climate change” NEAR/4 behavio\*) OR TI=( pro-environmental\* NEAR/4 behavio\*) OR TI=(proenvironmental\* NEAR/4 behavio\*) OR TI=(“green behavio\*”) OR TI=(“green consumerism”) OR TI=(“ act environmentally”) OR TI=( “sustainable lifestyle”) OR TI=( “sustainable living”) OR TI=( “sustainable behavio\*”) OR TI=(“climate change” OR “global warming” OR “greenhouse effect” OR “carbon footprint”) OR TI=(“ ecological footprint”) OR TI=(“ eco-friendly” OR “environmental friendliness”) OR TI=(“ greenhouse effect”) OR TI=(“ environmental\* concern\*”) OR TI=( “ecological\* concern\*”) OR TI=(“ environmental\* conscious\*”) OR TI=(“conservation of energy resources”) OR TI=( “conservation of natural resources”) OR TI=( “environmental impact\*”) OR TI=( “sustainable agriculture”) OR TI=(environmental\* NEAR/4 behavio\*) OR TS=(environmental\* NEAR/4 behavio\*) OR TS =( ecological NEAR/4 behavio\*) OR TS =(“climate change” NEAR/4 behavio\*) OR TS =( pro-environmental\* NEAR/4 behavio\*) OR TS =(proenvironmental\* NEAR/4 behavio\*) OR TS =(“green behavio\*”) OR TS =(“green consumerism”) OR TS =( “act environmentally”) OR TS =( “sustainable lifestyle”) OR TS =(“ sustainable living”) OR TS =(“ sustainable behavio\*”) OR TS=(“climate change” OR “global warming” OR “greenhouse effect” OR “carbon footprint”) OR TS=(“ ecological footprint”) OR TS=(“eco-friendly” OR “environmental friendliness”) OR TS=( “greenhouse effect”) OR TS=(“ environmental\* concern\*”) OR TS=( “ecological\* concern\*”) OR TS=(“ environmental\* conscious\*”) OR TS=(“conservation of energy resources”) OR TS=( “conservation of natural resources”) OR TS=(“ environmental impact\*”) OR TS=( “sustainable agriculture”) OR TI=(environmental\* NEAR/4 behavio\*)) NOT TS=(“ in vitro”) NOT TI=(“in vitro”) NOT TS=(“ in vivo”) NOT TI=(“ in vivo”) NOT TS=(“organic acids”) NOT TI=(“organic acids”) NOT TS=(membrane) NOT TI=(membrane) NOT TS=(cell) NOT TI=(cell) NOT TS=(cells) NOT TI=(cells) NOT TS=(cellular) NOT TI=(cellular) NOT TS=(mice) NOT TI=(mice) NOT TS=(rats) NOT TI=(rats) NOT TS=(rat) NOT TI=(rat) NOT TS=(mouse) NOT TI=(mouse))

3. #1 AND #2

4. ((TI=(“food preferences”) OR TI=(“food habits” OR “food choice”) OR TI=(“diet\* quality” OR “healthy eating” OR “diet\* patterns”) OR TI=(exercise) OR TI=(physical activity) OR TI=(exertion) OR TI=(physical fitness) OR TI=(walking) OR TI=(walk\* or cyclist\* or bicycl\* or bik\*) OR TI=(smoking) OR TI=(smoker) OR TI=(smokers) OR TI=(smok\* NEAR/15 tobacco) OR TI=(smok\* NEAR/15 cigarett\*) OR TI=(smok\* NEAR/15 hookah) OR TI=(dual\* NEAR/2 diagnos\*) OR TI=(substance-abuse) OR TI=(drug-dependence) OR TI=(alcohol-abuse) OR TI=(alcoholism) OR TS=(“food preferences”) OR TS=(“food habits” OR “food choice”) OR TS=(“diet\* quality” OR “healthy eating” OR “diet\* patterns”) OR TS=(exercise) OR TS=(“physical activity”) OR TS=(exertion) OR TS=(“physical fitness”) OR TS=(walking) OR TS=(walk\* or cyclist\* or bicycl\* or bik\*) OR TS=(smoking) OR TS=(smoker) OR TS=(smokers) OR TS=(smok\* NEAR/15 tobacco) OR TS=(smok\* NEAR/15 cigarett\*) OR TS=(smok\* NEAR/15 hookah) OR TS=(dual\* NEAR/2 diagnos\*) OR TS=(substance-abuse) OR TS=(drug-dependence) OR TS=(alcohol-abuse) OR TS=(alcoholism)) NOT TS=(“ in vitro”) NOT TI=(“in vitro”) NOT TS=(“ in vivo”) NOT TI=(“ in vivo”) NOT TS=(“organic acids”) NOT TI=(“organic acids”) NOT TS=(membrane) NOT TI=(membrane) NOT TS=(cell) NOT TI=(cell) NOT TS=(cells) NOT TI=(cells) NOT TS=(cellular) NOT TI=(cellular) NOT TS=(mice) NOT TI=(mice) NOT TS=(rats) NOT TI=(rats) NOT TS=(rat) NOT TI=(rat) NOT TS=(mouse) NOT TI=(mouse))

5. ((TI=((drug\* NEAR/3 abus\*) or (drug\* NEAR/3 addict\*) or (drug\* NEAR/3 depend\*)) OR TI=(polydrug\*) OR TI=( substance\*) OR TI=(alcohol\*) OR TI=(tranquil\*) OR TI=((chemical\* NEAR/3 abus\*) or (chemical\* NEAR/3 addict\*) or (chemical\* NEAR/3 depend\*)) OR TI=(narcotic\*) OR TI=(opiat\*) OR TI=(street drug\*) OR TI=(solvent\*) OR TI=(inhalant\*) OR TI=(psychotropic\*)

OR TI=(intoxica\*) OR TS=((drug\* NEAR/3 abus\*) or (drug\* NEAR/3 addict\*) or (drug\* NEAR/3 depend\*)) OR TS=(polydrug\*) OR TS=(substance\*) OR TS=(alcohol\*) OR TS=(tranquil\*) OR TS=((chemical\* NEAR/3 abus\*) or (chemical\* NEAR/3 addict\*) or (chemical\* NEAR/3 depend\*)) OR TS=(narcotic\*) OR TS=(opiat\*) OR TS=(street drug\*) OR TS=(solvent\*) OR TS=(inhalant\*) OR TS=(psychotropic\*) NOT

TS=(“ in vitro”) NOT TI=(“in vitro”) NOT TS=(“ in vivo”) NOT TI=( “in vivo”) NOT TS=(“organic acids”) NOT TI=(“organic acids”) NOT TS=(membrane) NOT TI=(membrane) NOT TS=(cell) NOT TI=(cell) NOT TS=(cells) NOT TI=(cells) NOT TS=(cellular) NOT TI=(cellular) NOT TS=(mice) NOT TI=(mice) NOT TS=(rats) NOT TI=(rats) NOT TS=(rat) NOT TI=(rat) NOT TS=(mouse) NOT TI=(mouse))

6. ((TI=(abus\*) OR TI=(use\*) OR TI=(misus\*) OR TI=(usin\*) OR TI=(utiliz\*) OR TI=(utilis\*) OR TI=(depend\*) OR TI=(addict\*) OR TI=(illegal\*) OR TI=(illicit\*) OR TI=(habit\*) OR TI=(withdraw\*) OR TI=(behavi\*) OR TI=(abstinence\*) OR TI=(abstain\*) OR TI=(rehab\*) OR TI=(intoxica\*) OR TI=(non-prescri\*) OR TS=(abus\*) OR TS=(use\*) OR TS=(misus\*) OR TS=(usin\*) OR TS=(utiliz\*) OR TS=(utilis\*) OR TS=(depend\*) OR TS=(addict\*) OR TS=(illegal\*) OR TS=(illicit\*) OR TS=(habit\*) OR TS=(withdraw\*) OR TS=(behavi\*) OR TS=(abstinence\*) OR TS=(abstain\*) OR TS=(rehab\*) OR TS=(intoxica\*) OR TS=(non-prescri\*) ) NOT

TS=(“ in vitro”) NOT TI=(“in vitro”) NOT TS=(“ in vivo”) NOT TI=( “in vivo”) NOT TS=(“organic acids”) NOT TI=(“organic acids”) NOT TS=(membrane) NOT TI=(membrane) NOT TS=(cell) NOT TI=(cell) NOT TS=(cells) NOT TI=(cells) NOT TS=(cellular) NOT TI=(cellular) NOT TS=(mice) NOT TI=(mice) NOT TS=(rats) NOT TI=(rats) NOT TS=(rat) NOT TI=(rat) NOT TS=(mouse) NOT TI=(mouse))

7. #5 AND #6

8. #4 or #7

9. ((TI=(sav\* NEAR/3 energy) or TI=(sav\* NEAR/3 water) or TI=(sav\* NEAR/3 electricity) or TI=(energy NEAR/3 efficien\*) or TI=(“energy conservation”) or TI=(“energy consumption”) or TI=(“low energy”) or TI=(“low carbon”) or TI=(“carbon footprint”) or TI=(“carbon friendly”) or TI=(“water conservation”) or TI=(“water saving”) or TI=(“wastewater reuse”) or TI=(“household waste”) or TI=(“domestic waste”) or TI=(“household waste management”) or TI=(“waste separation”) or TI=(“reduc\* waste”) or TI=(“reduc\* pack\*”) or TI=(“organic food”) or TI=(“organically grown”) or TI=(“local food”) or TI=(“locally grown”) or TI=(“ecological consumption”) or TI=(“food production practices”) or TI=(“food related lifestyle”) or TI=(“food waste”) or TI=(“plate waste”) or TI=(“food miles”) or TI=(“public transport\*”) or TI=(allotment NEAR/10 vegetable\*) or TI=(allotment NEAR/10 fruit) or TI=(allotment NEAR/10 bees) or TI=(recycling) or TS=(sav\* NEAR/3 energy) or TS=(sav\* NEAR/3 water) or TS=(sav\* NEAR/3 electricity) or TS=(energy NEAR/3 efficien\*) or TS=(“energy conservation”) or TS=(“energy consumption”) or TS=(“low energy”) or TS=(“low carbon”) or TS=(“carbon footprint”) or TS=(“carbon friendly”) or TS=(“water conservation”) or TS=(“water saving”) or TS=(“wastewater reuse”) or TS=(“household waste”) or TS=(“domestic waste”) or TS=(“household waste management”) or TS=(“waste separation”) or TS=(“reduc\* waste”) or TS=(“reduc\* pack\*”) or TS=(“organic food”) or TS=(“organically grown”) or TS=(“local food”) or TS=(“locally grown”) or TS=(“ecological consumption”) or TS=(“food production practices”) or TS=(“food related lifestyle”) or TS=(“food waste”) or TS=(“plate waste”) or TS=(“food miles”) or TS=(“public transport\*”) or TS=(allotment NEAR/10 vegetable\*) or TS=(allotment NEAR/10 fruit) or TS=(allotment NEAR/10 bees) or TS=(recycling)) NOT

TS=(“ in vitro”) NOT TI=(“in vitro”) NOT TS=(“ in vivo”) NOT TI=( “in vivo”) NOT TS=(“organic acids”) NOT TI=(“organic acids”) NOT TS=(membrane) NOT TI=(membrane) NOT TS=(cell) NOT TI=(cell) NOT TS=(cells) NOT TI=(cells) NOT TS=(cellular) NOT TI=(cellular) NOT TS=(mice) NOT TI=(mice) NOT TS=(rats) NOT TI=(rats) NOT TS=(rat) NOT TI=(rat) NOT TS=(mouse) NOT TI=(mouse))



10. ((TI=(“travel plan\*”) or TI=(“transport plan\*”) or TI=(“safe route\*”) or TI=(“safer route\*”) or TI=(“walking school bus\*”) or TI=(“walking bus\*”) or TI=(“ecological commut\*”) or TI=(“ecological transport\*”) or TI=(“mobility management plan\*”) or TI=(“travel to work”) or TI=(“commuter plan\*”) or TI=(travelsmart) or TI=(“walk to school”) or TI=(“travel behaviour chang\*”) or TI=(“travel behavior chang\*”) OR TS=(“travel plan\*”) or TS=(“transport plan\*”) or TS=(“safe route\*”) or TS=(“safer route\*”) or TS=(“walking school bus\*”) or TS=(“walking bus\*”) or TS=(ecological commut\*) or TS=(“ecological transport\*”) or TS=(“mobility management plan\*”) or TS=(“travel to work”) or TS=(“commuter plan\*”) or TS=(travelsmart) or TS=(“walk to school”) or TS=(“travel behaviour chang\*”) or TS=(“travel behavior chang\*”)) NOT TS=(“in vitro”) NOT TI=(“in vitro”) NOT TS=(“in vivo”) NOT TI=(“in vivo”) NOT TS=(“organic acids”) NOT TI=(“organic acids”) NOT TS=(membrane) NOT TI=(membrane) NOT TS=(cell) NOT TI=(cell) NOT TS=(cells) NOT TI=(cells) NOT TS=(cellular) NOT TI=(cellular) NOT TS=(mice) NOT TI=(mice) NOT TS=(rats) NOT TI=(rats) NOT TS=(rat) NOT TI=(rat) NOT TS=(mouse) NOT TI=(mouse))

11. ((TI=((modal or mode) and (choice\* or distribution\* or selection\* or shift\* or split\* or substitut\* or switch\* or transfer\* or use\* or chang\* or modif\*)) OR TS=((modal or mode) and (choice\* or distribution\* or selection\* or shift\* or split\* or substitut\* or switch\* or transfer\* or use\* or chang\* or modif\*))) NOT TS=(“in vitro”) NOT TI=(“in vitro”) NOT TS=(“in vivo”) NOT TI=(“in vivo”) NOT TS=(“organic acids”) NOT TI=(“organic acids”) NOT TS=(membrane) NOT TI=(membrane) NOT TS=(cell) NOT TI=(cell) NOT TS=(cells) NOT TI=(cells) NOT TS=(cellular) NOT TI=(cellular) NOT TS=(mice) NOT TI=(mice) NOT TS=(rats) NOT TI=(rats) NOT TS=(rat) NOT TI=(rat) NOT TS=(mouse) NOT TI=(mouse))

12. ((TI=(travel\*) or TI=(transportation\*) OR TS=(travel\*) or TS=(transportation\*)) NOT TS=(“in vitro”) NOT TI=(“in vitro”) NOT TS=(“in vivo”) NOT TI=(“in vivo”) NOT TS=(“organic acids”) NOT TI=(“organic acids”) NOT TS=(membrane) NOT TI=(membrane) NOT TS=(cell) NOT TI=(cell) NOT TS=(cells) NOT TI=(cells) NOT TS=(cellular) NOT TI=(cellular) NOT TS=(mice) NOT TI=(mice) NOT TS=(rats) NOT TI=(rats) NOT TS=(rat) NOT TI=(rat) NOT TS=(mouse) NOT TI=(mouse))

13. #11 AND #12

14. ((TI=(Automobile\* or “auto use\*”) or car or cars or “mechani\* transport\*”) or “motori\* transport\*”) or motorist\* or “personal transport\*”) or “road use\*”) or “motor vehic\*”) or vkt\* or vmt\* or “vehicle kilomet\*”) or “vehicle mile\*”) or (driv\* NEAR/5 (school\* or work\*))) OR TS=(Automobile\* or “auto use\*”) or car or cars or “mechani\* transport\*”) or “motori\* transport\*”) or motorist\* or “personal transport\*”) or “road use\*”) or “motor vehic\*”) or vkt\* or vmt\* or “vehicle kilomet\*”) or “vehicle mile\*”) or (driv\* NEAR/5 (school\* or work\*))) NOT TS=(“in vitro”) NOT TI=(“in vitro”) NOT TS=(“in vivo”) NOT TI=(“in vivo”) NOT TS=(“organic acids”) NOT TI=(“organic acids”) NOT TS=(membrane) NOT TI=(membrane) NOT TS=(cell) NOT TI=(cell) NOT TS=(cells) NOT TI=(cells) NOT TS=(cellular) NOT TI=(cellular) NOT TS=(mice) NOT TI=(mice) NOT TS=(rats) NOT TI=(rats) NOT TS=(rat) NOT TI=(rat) NOT TS=(mouse) NOT TI=(mouse))

15. ((TI=(walk\* or cyclist\* or cycling or bicycl\* or bik\*) or (bus or buses or busing or bussing or (train or trains or rail or railway) or “public transport\*”) or (carshar\* or carpool\* or (car\* NEAR/3 shar\*) or (car\* NEAR/3 pool\*)) or (“non-auto\*”) or (“non-motori\*”) or (telework\* or telecommut\*)) OR TS=(walk\* or cyclist\* or cycling or bicycl\* or bik\*) or (bus or buses or busing or bussing or (train or trains or rail or railway) or “public transport\*”) or (carshar\* or carpool\* or (car\* NEAR/3 shar\*) or (car\* NEAR/3 pool\*)) or (“non-auto\*”) or (“non-motori\*”) or (telework\* or telecommut\*)) NOT

TS=(“ in vitro”) NOT TI=(“in vitro”) NOT TS=(“ in vivo”) NOT TI=( “in vivo”) NOT TS=(“organic acids”) NOT TI=(“organic acids”) NOT TS=(membrane) NOT TI=(membrane) NOT TS=(cell) NOT TI=(cell) NOT TS=(cells) NOT TI=(cells) NOT TS=(cellular) NOT TI=(cellular) NOT TS=(mice) NOT TI=(mice) NOT TS=(rats) NOT TI=(rats) NOT TS=(rat) NOT TI =(rat) NOT TS=(mouse) NOT TI=(mouse))

16. #14 AND #15

17. ((TI=(“active commut\*” or “active travel\*” or “utilitarian walk\*” or “utilitarian cycl\*” or “green travel\*” or “greener travel\*” or “green transport\*” or “greener transport\*” or “ecological commut\*” or “ecological transport\*” or ecotravel\* or ecotransport\*or ecocommut\*) OR

TI=( “active transport\*”) OR

TS=(“active commut\*” or “active travel\*” or “utilitarian walk\*” or “utilitarian cycl\*” or “green travel\*” or “greener travel\*” or “green transport\*” or “greener transport\*” or “ecological commut\*” or “ecological transport\*” or ecotravel\* or ecotransport\*or ecocommut\*) OR

TS=(active transport\*)) NOT

TS=(“ in vitro”) NOT TI=(“in vitro”) NOT TS=(“ in vivo”) NOT TI=( “in vivo”) NOT TS=(“organic acids”) NOT TI=(“organic acids”) NOT TS=(membrane) NOT TI=(membrane) NOT TS=(cell) NOT TI=(cell) NOT TS=(cells) NOT TI=(cells) NOT TS=(cellular) NOT TI=(cellular) NOT TS=(mice) NOT TI=(mice) NOT TS=(rats) NOT TI=(rats) NOT TS=(rat) NOT TI =(rat) NOT TS=(mouse) NOT TI=(mouse))

18. #16 or #17

19. #10 OR #13 OR #18

20. #3 or #9

21. #8 AND #20

22. #19 OR #21

### Social Science Citation Index via Web of Science, 1956 to 08-01-2014 (N=7,589)

Limited to document types = article. Final set refined to OECD countries.

- (TI=( behavio\*) OR TS=( behavio\*) OR TI=( habit OR habits) OR TS=( habit OR habits ) OR TI=(behavio\* OR habits OR “health behavio\*” OR “risk reduction behavio\*”) OR TS=(behavio\* OR habits OR “health behavio\*” OR “risk reduction behavio\*”) OR TI=( life style ) OR TS=( life style) OR TI=( lifestyle ) OR TS=( lifestyle))
- (TI=(environmental\* NEAR/4 behavio\*) OR TI=( ecological NEAR/4 behavio\*) OR TI=(“climate change” NEAR/4 behavio\*) OR TI=( pro-environmental\* NEAR/4 behavio\*) OR TI=( proenvironmental\* NEAR/4 behavio\*) OR TI=(“green behavio\*”) OR TI=(“green consumerism”) OR TI=(“ act environmentally”) OR TI=( “sustainable lifestyle”) OR TI=( “sustainable living”) OR TI=( “sustainable behavio\*”) OR TI=(“climate change” OR “global warming” OR “greenhouse effect” OR “carbon footprint”) OR TI=( “ecological footprint”) OR TI=(“ eco-friendly” OR “environmental friendliness”) OR TI=(“ greenhouse effect”) OR TI=( “environmental\* concern\*”) OR TI=( “ecological\* concern\*”) OR TI=(“ environmental\* conscious\*”) OR TI=(“conservation of energy resources”) OR TI=( “conservation of natural resources”) OR TI=( “environmental impact\*”) OR TI=( “sustainable agriculture”) OR TI=(environmental\* NEAR/4 behavio\*) OR TS=(environmental\* NEAR/4 behavio\*) OR TS =( ecological NEAR/4 behavio\*) OR TS =(“climate change” NEAR/4 behavio\*) OR TS =( pro-environmental\* NEAR/4 behavio\*) OR TS =( proenvironmental\* NEAR/4 behavio\*) OR TS =(“green behavio\*”) OR TS =(“green consumerism”) OR TS =(“ act environmentally”) OR TS =( “sustainable lifestyle”) OR TS =(“ sustainable living”) OR TS =( “sustainable behavio\*”) OR TS=(“climate change” OR “global warming” OR “greenhouse effect” OR “carbon footprint”) OR TS=( “ecological footprint”) OR TS=(“eco-friendly” OR “environmental friendliness”) OR TS=(“greenhouse effect”) OR TS=( “environmental\* concern\*”) OR TS=( “ecological\* concern\*”) OR TS=(“ environmental\* conscious\*”) OR TS=(“conservation of

energy resources”) OR TS=( “conservation of natural resources”) OR TS=(“ environmental impact\*\*”) OR TS=( “sustainable agriculture”) OR TI=(environmental\* NEAR/4 behavio\*)

3. #1 AND #2

4. (TI=(“food preferences”) OR TI=(“food habits” OR “food choice”) OR TI=(“diet\* quality” OR “healthy eating” OR “diet\* patterns”) OR TI=(exercise) OR TI=(physical activity) OR TI=(exertion) OR TI=(physical fitness) OR TI=(walking) OR TI=(walk\* or cyclist\* or bicycl\* or bik\*) OR TI=(smoking) OR TI=(smoker) OR TI=(smokers) OR TI=(smok\* NEAR/15 tobacco) OR TI=(smok\* NEAR/15 cigarett\*) OR TI=(smok\* NEAR/15 hookah) OR TI=(dual\* NEAR/2 diagnos\*) OR TI=(substance-abuse) OR TI=(drug-dependence) OR TI=(alcohol-abuse) OR TI=(alcoholism) OR TS=(“food preferences”) OR TS=(“food habits” OR “food choice”) OR TS=(“diet\* quality” OR “healthy eating” OR “diet\* patterns”) OR TS=(exercise) OR TS=(“physical activity”) OR TS=(exertion) OR TS=(“physical fitness”) OR TS=(walking) OR TS=(walk\* or cyclist\* or bicycl\* or bik\*) OR TS=(smoking) OR TS=(smoker) OR TS=(smokers) OR TS=(smok\* NEAR/15 tobacco) OR TS=(smok\* NEAR/15 cigarett\*) OR TS=(smok\* NEAR/15 hookah) OR TS=(dual\* NEAR/2 diagnos\*) OR TS=(substance-abuse) OR TS=(drug-dependence) OR TS=(alcohol-abuse) OR TS=(alcoholism))

5. (TI=((drug\* NEAR/3 abus\*) or (drug\* NEAR/3 addict\*) or (drug\* NEAR/3 depend\*)) OR TI=(polydrug\*) OR TI=(substance\*) OR TI=(alcohol\*) OR TI=(tranquil\*) OR TI=((chemical\* NEAR/3 abus\*) or (chemical\* NEAR/3 addict\*) or (chemical\* NEAR/3 depend\*)) OR TI=(narcotic\*) OR TI=(opiat\*) OR TI=(street drug\*) OR TI=(solvent\*) OR TI=(inhalant\*) OR TI=(psychotropic\*) OR TI=(intoxica\*) OR TS= ((drug\* NEAR/3 abus\*) or (drug\* NEAR/3 addict\*) or (drug\* NEAR/3 depend\*)) OR TS = (polydrug\*) OR TS = (substance\*) OR TS = (alcohol\*) OR TS = (tranquil\*) OR TS =((chemical\* NEAR/3 abus\*) or (chemical\* NEAR/3 addict\*) or (chemical\* NEAR/3 depend\*)) OR TS =(narcotic\*) OR TS =(opiat\*) OR TS =(street drug\*) OR TS =(solvent\*) OR TS =(inhalant\*) OR TS =(psychotropic\*)

6. (TI=(abus\*) OR TI=(use\*) OR TI=(misus\*) OR TI=(usin\*) OR TI=(utiliz\*) OR TI=(utilis\*) OR TI=(depend\*) OR TI=(addict\*) OR TI=(illegal\*) OR TI=(illicit\*) OR TI=(habit\*) OR TI=(withdraw\*) OR TI=(behavi\*) OR TI=(abstinence\*) OR TI=(abstain\*) OR TI=(rehab\*) OR TI=(intoxica\*) OR TI=(non-prescri\*) OR TS=(abus\*) OR TS =(use\*) OR TS =(misus\*) OR TS =(usin\*) OR TS =(utiliz\*) OR TS =(utilis\*) OR TS =(depend\*) OR TS =(addict\*) OR TS =(illegal\*) OR TS =(illicit\*) OR TS =(habit\*) OR TS =(withdraw\*) OR TS =(behavi\*) OR TS =(abstinence\*) OR TS =(abstain\*) OR TS =(rehab\*) OR TS =(intoxica\*) OR TS =(non-prescri\*) )

7. #5 AND #6

8. #4 or #7

9. (TI=(sav\* NEAR/3 energy) or TI=(sav\* NEAR/3 water) or TI=(sav\* NEAR/3 electricity) or TI=(energy NEAR/3 efficien\*) or TI=(“energy conservation”) or TI=(“energy consumption”) or TI=(“low energy”) or TI=(“low carbon”) or TI=(“carbon footprint”) or TI=(“carbon friendly”) or TI=(“water conservation”) or TI=(“water saving”) or TI=(“wastewater reuse”) or TI=(“household waste”) or TI=(“domestic waste”) or TI=(“household waste management”) or TI=(“waste separation”) or TI=(“reduc\* waste”) or TI=(“reduc\* pack\*”) or TI=(“organic food”) or TI=(“organically grown”) or TI=(“local food”) or TI=(“locally grown”) or TI=(“ecological consumption”) or TI=(“food production practices”) or TI=(“food related lifestyle”) or TI=(“food waste”) or TI=(“plate waste”) or TI=(“food miles”) or TI=(“public transport\*”) or TI=(allotment NEAR/10 vegetable\*) or TI=(allotment NEAR/10 fruit) or TI=(allotment NEAR/10 bees) or TI=(recycling) or TS=(sav\* NEAR/3 energy) or TS =(sav\* NEAR/3 water) or TS =(sav\* NEAR/3 electricity) or TS =(energy NEAR/3 efficien\*) or TS =(“energy conservation”) or TS =(“energy consumption”) or TS =(“low energy”) or TS =(“low carbon”) or TS =(“carbon footprint”) or TS =(“carbon friendly”) or TS =(“water conservation”) or TS =(“water saving”) or TS =(“wastewater reuse”) or TS =(“household waste”) or TS =(“domestic waste”) or TS =(“household waste



management”) or TS=(“waste separation”) or TS=(“reduc\* waste”) or TS=(“reduc\* pack\*”) or TS=(“organic food”) or

TS=(“organically grown”) or TS=(“local food”) or TS=(“locally grown”) or TS=(“ecological consumption”) or TS=(“food production practices”) or TS=(“food related lifestyle”) or TS=(“food waste”) or TS=(“plate waste”) or TS=(“food miles”) or TS=(“public transport\*”) or TS=(allotment NEAR/10 vegetable\*) or TS=(allotment NEAR/10 fruit) or TS=(allotment NEAR/10 bees) or TS=(recycling))

10. (TI=(“travel plan\*”) or TI=( “transport plan\*”) or TI=( “safe route\*”) or TI=( “safer route\*”) or TI=( “walking school bus\*”) or TI=( “walking bus\*”) or TI=( “ecological commut\*”) or TI=( “ecological transport\*”) or TI=( “mobility management plan\*”) or TI=( “travel to work”) or TI=( “commuter plan\*”) or TI=( travelsmart) or TI=( “walk to school”) or TI=( “travel behaviour chang\*”) or TI=( “travel behavior chang\*”) OR TS=( “travel plan\*”) or TS=( “transport plan\*”) or TS=( “safe route\*”) or TS=( “safer route\*”) or TS=( “walking school bus\*”) or TS=( “walking bus\*”) or TS=( ecological commut\*) or TS=( “ecological transport\*”) or TS=( “mobility management plan\*”) or TS=( “travel to work”) or TS=( “commuter plan\*”) or TS=( travelsmart) or TS=( “walk to school”) or TS=( “travel behaviour chang\*”) or TS=( “travel behavior chang\*”))

11. (TI=((modal or mode) and (choice\* or distribution\* or selection\* or shift\* or split\* or substitut\* or switch\* or transfer\* or use\* or chang\* or modif\*)) OR TS=((modal or mode) and (choice\* or distribution\* or selection\* or shift\* or split\* or substitut\* or switch\* or transfer\* or use\* or chang\* or modif\*)) )

12. (TI=(travel\*) or TI=(transportation\*) OR TS=(travel\*) or TS=(transportation\*))

13. #11 AND #12

14. (TI=(Automobile\* or “auto use\*”) or car or cars or “mechani\* transport\*”) or “motori\* transport\*”) or motorist\* or “personal transport\*”) or “road use\*”) or “motor vehic\*”) or vkt\* or vmt\* or “vehicle kilomet\*”) or “vehicle mile\*”) or (driv\* NEAR/5 (school\* or work\*)) OR TS=(Automobile\* or “auto use\*”) or car or cars or “mechani\* transport\*”) or “motori\* transport\*”) or motorist\* or “personal transport\*”) or “road use\*”) or “motor vehic\*”) or vkt\* or vmt\* or “vehicle kilomet\*”) or “vehicle mile\*”) or (driv\* NEAR/5 (school\* or work\*)))))

15. (TI=(walk\* or (cyclist\* or cycling or bicycl\* or bik\*) or (bus or buses or busing or bussing or (train or trains or rail or railway) or “public transport\*”) or (carshar\* or carpool\* or (car\* NEAR/3 shar\*) or (car\* NEAR/3 pool\*)) or (“non-auto\*”) or “non-motori\*”) or (telework\* or telecommut\*)) OR TS=(walk\* or (cyclist\* or cycling or bicycl\* or bik\*) or (bus or buses or busing or bussing or (train or trains or rail or railway) or “public transport\*”) or (carshar\* or carpool\* or (car\* NEAR/3 shar\*) or (car\* NEAR/3 pool\*)) or (“non-auto\*”) or “non-motori\*”) or (telework\* or telecommut\*))

16. #14 AND #15

17. (TI=(“active commut\*”) or “active travel\*”) or “utilitarian walk\*”) or “utilitarian cycl\*”) or “green travel\*”) or “greener travel\*”) or “green transport\*”) or “greener transport\*”) or “ecological commut\*”) or “ecological transport\*”) or ecotravel\* or ecotransport\* or ecocommut\*) OR

TI=(“active transport\*”) OR

TS=(“active commut\*”) or “active travel\*”) or “utilitarian walk\*”) or “utilitarian cycl\*”) or “green travel\*”) or “greener travel\*”) or “green transport\*”) or “greener transport\*”) or “ecological commut\*”) or “ecological transport\*”) or ecotravel\* or ecotransport\* or ecocommut\*) OR

TS=(active transport\*) )

18. #16 or #17

19. #10 OR #13 OR #18

20. #3 or #9

21. #8 AND #20

22. #19 OR #21

**Table S1.** Description of included studies in the scoping review of bivariate analyses of health and environmental behaviors.

| <b>ID/1st Author/ Date</b>                 | <b>Country National/Regional</b> | <b>Survey/Recruitment /Date of Collection</b>          | <b>Analysis</b>                   | <b>Number Analysed</b>          | <b>Sample Age</b>  | <b>Data Collection Method (of Behaviors Analysed Together) <sup>a</sup></b>      | <b>Environmental Behavior/s</b>                                                | <b>Health Behavior/s</b>                        | <b>Category/s for this Review</b> |
|--------------------------------------------|----------------------------------|--------------------------------------------------------|-----------------------------------|---------------------------------|--------------------|----------------------------------------------------------------------------------|--------------------------------------------------------------------------------|-------------------------------------------------|-----------------------------------|
| <b>Active Travel and Physical Activity</b> |                                  |                                                        |                                   |                                 |                    |                                                                                  |                                                                                |                                                 |                                   |
| [26]<br>Abbott 2009                        | Australia<br>Regional            | 2006 Healthy Kids<br>Queensland (HKQ)                  | Cross-sectional                   | 2076                            | Children<br>6–16   | <i>Travel:</i><br>questionnaire<br><i>Physical activity:</i><br>pedometer        | Active travel to<br>school                                                     | Physical<br>activity-steps                      | AT/PA                             |
| [27]<br>Alexander<br>2005                  | UK<br>Regional                   | 2004 Four schools                                      | Cross-sectional                   | 92                              | 13–14              | <i>Transport:</i><br>questionnaire<br><i>Physical activity:</i><br>accelerometer | Active travel to<br>school                                                     | Moderate to<br>vigorous<br>physical<br>activity | AT/PA                             |
| [28]<br>Anderson<br>2009                   | Denmark<br>Regional              | 1983 Danish Youth<br>and Sports Study                  | Cross-sectional                   | 1249                            | 15–19              | Questionnaire                                                                    | Active travel to<br>school                                                     | Leisure time<br>physical<br>activity            | AT/PA                             |
| [29]<br>Anderson<br>2011                   | Denmark<br>Regional              | 1997–1998 and<br>2003–04 European<br>Youth Heart Study | Cross-sectional &<br>Longitudinal | 589 baseline &<br>334 follow-up | Children<br>9 & 15 | <i>Transport:</i><br>questionnaire<br><i>Physical activity:</i><br>accelerometer | Cycling to<br>school<br>compared to<br>non-cyclists<br>Plus change in<br>above | Total physical<br>activity                      | AT/PA                             |
| [30]<br>Baig 2009                          | UK<br>Regional                   | (Date NR) Three<br>middle schools                      | Cross-sectional                   | 673                             | Children<br>11–14  | Questionnaire                                                                    | Active travel to<br>school                                                     | Physical<br>activity during<br>school time      | AT/PA                             |

Table S1. Cont.

| <b>ID/1st Author/<br/>Date</b> | <b>Country<br/>National/Regional</b>   | <b>Survey/Recruitm<br/>ent /Date of<br/>Collection</b> | <b>Analysis</b>     | <b>Number<br/>Analysed</b> | <b>Sample Age</b> | <b>Data Collection<br/>Method (of<br/>Behaviors<br/>Analysed<br/>Together) <sup>a</sup></b> | <b>Environmental<br/>Behavior/s</b> | <b>Health<br/>Behavior/s</b>                                                 | <b>Category/s<br/>for this<br/>Review</b> |
|--------------------------------|----------------------------------------|--------------------------------------------------------|---------------------|----------------------------|-------------------|---------------------------------------------------------------------------------------------|-------------------------------------|------------------------------------------------------------------------------|-------------------------------------------|
| [31] Borrestad<br>2013         | Norway Regional                        | 2009 Two schools                                       | Cross-<br>sectional | 58                         | Children<br>10–12 | Questionnaire                                                                               | Active travel to<br>school          | Moderate to<br>vigorous physical<br>activity                                 | AT/PA                                     |
| [32]<br>Brophy 2011            | UK<br>Nationally<br>representative     | 2000–2002<br>Millennium<br>Cohort Study                | Cross-<br>sectional | 13,641                     | Children          | Parental<br>interviews using<br>computer assisted<br>questionnaire                          | Walking to school                   | Sedentary<br>behavior<br>Organised and<br>non-organised<br>physical activity | AT/SB<br>AT/PA                            |
| [33]<br>Butler 2007            | Canada<br>Nationally<br>representative | 2003 Canadian<br>Community<br>Health Survey<br>(CCHS)  | Cross-<br>sectional | 77,953                     | Adults<br>15+     | Self-completed<br>computer-assisted<br>telephone<br>interview                               | Active travel                       | Sedentary<br>occupation<br>Smoking<br>Leisure time<br>physical activity      | AT/SB<br>AT/OHB<br>AT/PA                  |
| [34]<br>Carse 2013             | UK<br>Regional                         | 2009 Commuting<br>and Health in<br>Cambridge study     | Cross-sectional     | 1164 (3784<br>trips)       | Adults<br>16+     | Self- completed<br>questionnaire                                                            | Cycling for<br>transport            | Walking for<br>leisure                                                       | AT/PA                                     |

Table S1. Cont.

| ID/1st Author/<br>Date | Country<br>National/Regional   | Survey/Recruitm<br>ent /Date of<br>Collection                                       | Analysis                            | Number<br>Analysed   | Sample<br>Age     | Data Collection<br>Method (of<br>Behaviors Analysed<br>Together) <sup>a</sup>                                                   | Environment<br>al Behavior/s                            | Health<br>Behavior/s                                                                                       | Category/s<br>for this<br>Review |
|------------------------|--------------------------------|-------------------------------------------------------------------------------------|-------------------------------------|----------------------|-------------------|---------------------------------------------------------------------------------------------------------------------------------|---------------------------------------------------------|------------------------------------------------------------------------------------------------------------|----------------------------------|
| [35]<br>Carver 2011    | Australia<br>Regional          | 2001–2006<br>Children Living<br>in Active<br>Neighbourhoods                         | Cross-sectional<br>at 3 time points | 1214,<br>607,<br>443 | Children<br>5–17  | <i>Transport:</i><br>questionnaire<br>(parent’s of younger<br>children completed)<br><i>Physical activity:</i><br>accelerometer | Active travel<br>to school and<br>other<br>destinations | Moderate to<br>vigorous physical<br>activity                                                               | AT/PA                            |
| [36]<br>Cerin 2009     | Australia<br>Regional          | 2003–2004 High<br>and low walkable<br>suburbs of<br>Adelaide                        | Cross-sectional                     | 2194                 | Adults<br>20–60   | Questionnaire                                                                                                                   | Active travel                                           | Leisure time<br>physical activity                                                                          | AT/PA                            |
| [37]<br>Chillon 2011   | 10 European Cities             | 2006–8 HELENA<br>(Healthy Lifestyle<br>in Europe by<br>Nutrition in<br>Adolescence) | Cross-sectional                     | 3112                 | Children<br>12–17 | <i>Transport:</i><br>questionnaire<br><i>Physical activity:</i><br>accelerometer and<br>questionnaire                           | Active travel                                           | Total physical<br>activity Moderate<br>to vigorous<br>physical activity<br>Non-travel<br>physical activity | AT/PA                            |
| [38]<br>Chillon 2010   | Estonia/<br>Sweden<br>Regional | 1998/99 European<br>Youth Heart<br>Study                                            | Cross-sectional                     | 2271                 | Children<br>9–16  | <i>Transport:</i><br>questionnaire<br><i>Physical activity:</i><br>activity monitor                                             | Active travel<br>to school                              | Moderate to<br>vigorous physical<br>activity                                                               | AT/PA                            |

Table S1. Cont.

| ID/1st Author/<br>Date | Country<br>National/Regional | Survey/Recruitm<br>ent /Date of<br>Collection                                                             | Analysis                            | Number<br>Analysed | Sample<br>Age     | Data Collection<br>Method (of<br>Behaviors Analysed<br>Together) <sup>a</sup>    | Environment<br>al Behavior/s                          | Health<br>Behavior/s                                                                    | Category/s<br>for this<br>Review |
|------------------------|------------------------------|-----------------------------------------------------------------------------------------------------------|-------------------------------------|--------------------|-------------------|----------------------------------------------------------------------------------|-------------------------------------------------------|-----------------------------------------------------------------------------------------|----------------------------------|
| [39]<br>Cooper 2005    | Denmark<br>Regional          | 1997/98 European<br>Youth Heart<br>Study                                                                  | Cross-sectional                     | 323                | Children<br>9     | <i>Transport:</i><br>questionnaire<br><i>Physical activity:</i><br>accelerometer | Active travel<br>to school                            | Moderate to<br>vigorous physical<br>activity                                            | AT/PA                            |
| [40]<br>Cooper 2003    | UK<br>Regional               | 2002 Five urban<br>primary schools                                                                        | Cross-sectional                     | 114                | Children<br>10    | <i>Transport:</i><br>questionnaire<br><i>Physical activity:</i><br>accelerometer | Walking to<br>school                                  | Moderate to<br>vigorous physical<br>activity<br>Meeting physical<br>activity guidelines | AT/PA                            |
| [41]<br>Cooper 2012    | UK Regional                  | 2006 & 2009<br>Personal and<br>Environmental<br>Associations with<br>Children's Health<br>(PEACH) project | Cross-sectional<br>& Longitudinal   | 500                | Children<br>11–12 | <i>Transport:</i><br>questionnaire<br><i>Physical activity:</i><br>accelerometer | Active travel<br>to school<br>Plus change in<br>above | Moderate to<br>vigorous physical<br>activity                                            | AT/PA                            |
| [42]<br>Cooper 2010    | UK<br>Regional               | 2006 Personal and<br>Environmental<br>Associations with<br>Children's Health<br>(pilot study)             | Cross-sectional                     | 137                | Children<br>10–11 | <i>Transport:</i><br>questionnaire<br><i>Physical activity:</i><br>accelerometer | Active travel<br>to school                            | Moderate to<br>vigorous physical<br>activity                                            | AT/PA                            |
| [43]<br>Cooper 2008    | Denmark<br>Regional          | 1997 & 2003<br>European Youth<br>Heart Study                                                              | Cross-sectional<br>at 2 time points | 384                | Children<br>8–10  | <i>Transport:</i><br>questionnaire<br><i>Physical activity:</i><br>accelerometer | Active travel<br>to school                            | Moderate to<br>vigorous physical<br>activity                                            | AT/PA                            |



Table S1. Cont.

| ID/1st Author/<br>Date     | Country<br>National/Regional            | Survey/Recruitm<br>ent /Date of<br>Collection                            | Analysis        | Number<br>Analysed | Sample<br>Age      | Data Collection<br>Method (of<br>Behaviors<br>Analysed<br>Together) <sup>a</sup>                    | Environmental<br>Behavior/s              | Health<br>Behavior/s                                                         | Category/s<br>for this<br>Review |
|----------------------------|-----------------------------------------|--------------------------------------------------------------------------|-----------------|--------------------|--------------------|-----------------------------------------------------------------------------------------------------|------------------------------------------|------------------------------------------------------------------------------|----------------------------------|
| [44]<br>Cooper 2006        | Denmark<br>Regional                     | 1998-9 European<br>Youth Heart<br>Study                                  | Cross-sectional | 531                | Children<br>9 & 15 | <i>Transport:</i><br>questionnaire<br><i>Physical activity:</i><br>accelerometer                    | Active travel to<br>school               | Total physical<br>activity<br>Moderate to<br>vigorous physical<br>activity   | AT/PA                            |
| [45]<br>Daly-Smith<br>2011 | UK<br>Regional                          | 2006<br>64 schools                                                       | Cross-sectional | 5422               | Children<br>8–9    | Questionnaire                                                                                       | Active travel to<br>school               | Meeting physical<br>activity guidelines                                      | AT/PA                            |
| [46]<br>Davis 2011         | UK<br>Regional                          | 2007–2008<br>Random sample<br>of patients from<br>GP lists               | Cross-sectional | 214                | Adults<br>70+      | <i>Transport:</i> self-<br>completed log<br><i>Physical activity:</i><br>accelerometer              | Public transport<br>use<br>Active travel | Physical activity –<br>steps<br>Moderate to<br>vigorous physical<br>activity | PT/PA<br>AT/PA                   |
| [47]<br>de Bruijn 2009     | Holland<br>Regional                     | 2006 Amsterdam<br>Growth And<br>Health<br>Longitudinal<br>Study (AGAHLS) | Cross-sectional | 317                | Adults<br>Mean 42  | Questionnaire                                                                                       | Active travel                            | Leisure-time<br>physical activity<br>(walking and<br>cycling)                | AT/PA                            |
| [48]<br>De Cocker<br>2007  | Belgium<br>Nationally<br>representative | 2005 Random<br>sample from<br>public record<br>office                    | Cross-sectional | 1239               | Adults<br>25–75    | <i>Transport:</i><br>telephone interview<br>questionnaire<br><i>Physical activity:</i><br>pedometer | Active travel                            | Total physical<br>activity                                                   | AT/PA                            |

Table S1. Cont.

| ID/1st Author/<br>Date | Country<br>National/Regional           | Survey/Recruitm<br>ent /Date of<br>Collection                        | Analysis        | Number<br>Analysed | Sample<br>Age     | Data Collection<br>Method (of<br>Behaviors<br>Analysed<br>Together) <sup>a</sup>                         | Environmental<br>Behavior/s                          | Health<br>Behavior/s                                                   | Category/s<br>for this<br>Review |
|------------------------|----------------------------------------|----------------------------------------------------------------------|-----------------|--------------------|-------------------|----------------------------------------------------------------------------------------------------------|------------------------------------------------------|------------------------------------------------------------------------|----------------------------------|
| [49]<br>Dollman 2007   | Australia<br>Regional                  | 2005 Schools in<br>Southern<br>Australia                             | Cross-sectional | 1643               | Children<br>9–15  | Parent completed<br>questionnaire                                                                        | Active travel to<br>school                           | Leisure-time<br>physical activity<br>Neighbourhood<br>active travel    | AT/PA                            |
| [50]<br>Dombois 2007   | Switzerland<br>Regional                | 2004 Three alpine<br>communities                                     | Cross-sectional | 901                | Adults<br>18+     | Telephone<br>interview                                                                                   | Active travel to<br>work or to<br>leisure activities | Meeting physical<br>activity guidelines                                | AT/PA                            |
| [51]<br>Drygas 2009    | Poland<br>Nationally<br>representative | 2002-2005<br>National Polish<br>Health Survey<br>(WOBASZ<br>Project) | Cross-sectional | 12,552             | Adults<br>20–74   | Interview<br>administered<br>questionnaire                                                               | Active travel to<br>work                             | Leisure-time<br>physical activity<br>Occupational<br>physical activity | AT/PA                            |
| [52]<br>Ducheyne 2012  | Belgium<br>Regional                    | 2010-2011<br>Random sample<br>of schools                             | Cross-sectional | 850                | Children<br>10–12 | Parent- completed<br>questionnaire                                                                       | Cycling to<br>school                                 | Sedentary<br>behavior<br>Organised<br>physical activity                | AT/SB<br>AT/PA                   |
| [53]<br>Duncan 2008    | New Zealand<br>Regional                | 2004-2005<br>39 schools                                              | Cross-sectional | 1513               | Children<br>5–16  | <i>Transport:</i> Self or<br>parent completed<br>questionnaire<br><i>Physical activity:</i><br>pedometer | Active travel to<br>school                           | Total physical<br>activity                                             | AT/PA                            |

Table S1. Cont.

| ID/1st Author/<br>Date | Country<br>National/Regional                | Survey/Recruitm<br>ent /Date of<br>Collection                                                                      | Analysis        | Number<br>Analysed | Sample<br>Age     | Data Collection<br>Method (of<br>Behaviors<br>Analysed<br>Together) <sup>a</sup>                                 | Environmental<br>Behavior/s | Health<br>Behavior/s                                                                                                                                    | Category/s<br>for this<br>Review |
|------------------------|---------------------------------------------|--------------------------------------------------------------------------------------------------------------------|-----------------|--------------------|-------------------|------------------------------------------------------------------------------------------------------------------|-----------------------------|---------------------------------------------------------------------------------------------------------------------------------------------------------|----------------------------------|
| [54]<br>Engbers 2010   | Netherlands<br>National                     | 2008 Random<br>sample of<br>employed persons                                                                       | Cross-sectional | 799                | Mixed<br>13-65    | Self-completed<br>internet survey                                                                                | Cycling to work             | Sedentary<br>behavior<br>Sedentary<br>occupation<br>Cycling for<br>leisure<br>Organised<br>physical activity<br>Meeting physical<br>activity guidelines | AT/SB<br>AT/PA                   |
| [55]<br>Faulkner 2013  | Canada<br>Regional                          | 2010-2011 16<br>schools                                                                                            | Cross-sectional | 785                | Children<br>10–12 | <i>Transport:</i> Parent<br>completed<br>questionnaire<br><i>Physical activity:</i><br>accelerometer             | Walking to<br>school        | Moderate to<br>vigorous physical<br>activity                                                                                                            | AT/PA                            |
| [56]<br>Farrer 2013    | New Zealand<br>Nationally<br>representative | 2008/2009<br>National Survey<br>of Children and<br>Young People's<br>Physical Activity<br>and Dietary<br>Behaviors | Cross-sectional | 679                | Children<br>10–16 | <i>Transport,<br/>sedentary behaviors<br/>and diet:</i> interviews<br><i>Physical activity:</i><br>accelerometer | Active travel               | Moderate to<br>vigorous physical<br>activity<br>Sedentary<br>behavior<br>Fruit and<br>vegetable intake                                                  | AT/PA<br>AT/OHB                  |

Table S1. Cont.

| ID/1st Author/<br>Date | Country<br>National/Regional        | Survey/Recruitm<br>ent /Date of<br>Collection                                                     | Analysis        | Number<br>Analysed | Sample<br>Age    | Data Collection<br>Method (of<br>Behaviors<br>Analysed<br>Together) <sup>a</sup>                                                                                                      | Environmental<br>Behavior/s     | Health Behavior/s                                                | Category/<br>s for this<br>Review |
|------------------------|-------------------------------------|---------------------------------------------------------------------------------------------------|-----------------|--------------------|------------------|---------------------------------------------------------------------------------------------------------------------------------------------------------------------------------------|---------------------------------|------------------------------------------------------------------|-----------------------------------|
| [57]<br>Ford 2007      | UK<br>Regional                      | (year NR)<br>Two schools                                                                          | Cross-sectional | 239                | Children<br>5–11 | <i>Commuting mode:</i><br>Parent- completed<br>questionnaire<br><i>Energy intake:</i><br>Parent and child<br>completed<br>questionnaire<br><i>Physical activity:</i><br>accelerometer | Active travel to<br>school      | Energy intake<br>Total physical<br>activity                      | AT/OHB<br>AT/PA                   |
| [58]<br>Freeman 2013   | USA<br>Regional                     | 2003 New York<br>City Community<br>Health Survey<br>(CHS)                                         | Cross-sectional | 9802               | Adults<br>18+    | Telephone survey                                                                                                                                                                      | Active travel<br>over 10 blocks | Physical activity                                                | AT/PA                             |
| [59]<br>Fulton 2005    | USA<br>Nationally<br>representative | 1996                                                                                              | Cross-sectional | 1395               | Children<br>9–18 | Telephone survey                                                                                                                                                                      | Active travel to<br>school      | Physical activity<br>frequency                                   | AT/PA                             |
| [60]<br>Furie 2012     | USA<br>Nationally<br>representative | 2006-2007 &<br>2009-2010<br>National Health<br>and Nutrition<br>Examination<br>Survey<br>(NHANES) | Cross-sectional | 9933               | Adults<br>≥20    | NR                                                                                                                                                                                    | Active travel                   | Smoking<br>Leisure time and<br>occupational<br>physical activity | AT/OHB<br>AT/PA                   |

Table S1. Cont.

| ID/1st Author/<br>Date        | Country<br>National/Regional        | Survey/Recruitm<br>ent /Date of<br>Collection                                              | Analysis        | Number<br>Analysed | Sample<br>Age     | Data Collection<br>Method (of<br>Behaviors Analysed<br>Together) <sup>a</sup>              | Environmental<br>Behavior/s                                             | Health Behavior/s                                                      | Category/<br>s for this<br>Review |
|-------------------------------|-------------------------------------|--------------------------------------------------------------------------------------------|-----------------|--------------------|-------------------|--------------------------------------------------------------------------------------------|-------------------------------------------------------------------------|------------------------------------------------------------------------|-----------------------------------|
| [61]<br>Goodman 2011          | UK<br>Regional                      | 2002-2006<br>Convenience<br>sample                                                         | Cross-sectional | 345                | Children<br>8–13  | <i>Transport:</i><br>questionnaire<br><i>Physical activity:</i><br>accelerometer           | Active travel to<br>school<br>Active travel to<br>other<br>destinations | Moderate to<br>vigorous physical<br>activity (not in<br>active travel) | AT/PA                             |
| [62]<br>Gordon-Larsen<br>2005 | USA<br>Nationally<br>representative | 2001-2002<br>The National<br>Longitudinal<br>Study of<br>Adolescent Health<br>(Add Health) | Cross-sectional | 10771              | Adults<br>18–28   | Questionnaire                                                                              | Active travel to<br>work or school                                      | Meeting physical<br>activity guidelines                                | AT/PA                             |
| [63]<br>Goodman 2012          | UK<br>Regional                      | 2010 iConnect<br>study                                                                     | Cross-sectional | 3463               | Adults<br>18–96   | Questionnaire                                                                              | Active travel for<br>any purpose                                        | Leisure time<br>physical activity                                      | AT/PA                             |
| [64]<br>Grow 2008             | US<br>Regional                      | (Date NR) Three<br>metropolitan areas                                                      | Cross-sectional | 211                | Children<br>5–18  | Parent or adolescent<br>completed<br>questionnaire                                         | Active travel to<br>recreation sites                                    | Leisure time<br>physical activity                                      | AT/PA                             |
| [65]<br>Harten 2004           | Australia<br>Regional               | (Date NR)<br>11 schools                                                                    | Cross-sectional | 136                | Children<br>11–12 | <i>Transport:</i> interview<br><i>Physical activity:</i><br>computerised activity<br>diary | Active travel to<br>any destination                                     | Total physical<br>activity<br>Energy<br>expenditure                    | AT/PA                             |
| [66]<br>Hearst 2013           | USA<br>Regional                     | 2006-2008<br>TREC–IDEA and<br>ECHO studies                                                 | Cross-sectional | 550                | Adults            | Questionnaire                                                                              | Walking for<br>transport                                                | Walking for leisure                                                    | AT/PA                             |



Table S1. Cont.

| ID/1st Author/<br>Date      | Country<br>National/Regional           | Survey/Recruitm<br>ent /Date of<br>Collection                   | Analysis        | Number<br>Analysed | Sample<br>Age     | Data Collection<br>Method (of<br>Behaviors Analysed<br>Together) <sup>a</sup>                                                                               | Environmental<br>Behavior/s | Health<br>Behavior/s                                                                                                                                                      | Category/s<br>for this<br>Review |
|-----------------------------|----------------------------------------|-----------------------------------------------------------------|-----------------|--------------------|-------------------|-------------------------------------------------------------------------------------------------------------------------------------------------------------|-----------------------------|---------------------------------------------------------------------------------------------------------------------------------------------------------------------------|----------------------------------|
| [67]<br>Heelan 2005         | USA<br>Regional                        | (year NR)<br>Five rural schools<br>in a state                   | Cross-sectional | 320                | Children<br>9–11  | Self-completed<br>questionnaires                                                                                                                            | Active travel to<br>school  | Sedentary<br>behavior<br>Total physical<br>activity                                                                                                                       | AT/SB<br>AT/PA                   |
| [68]<br>Hohepa 2008         | New Zealand<br>Regional                | 2005<br>Three schools in<br>Auckland                            | Cross-sectional | 236                | Children<br>12–18 | <i>Travel:</i> questionnaire<br><i>Physical activity:</i><br>pedometer                                                                                      | Walking to<br>school        | Physical activity<br>steps                                                                                                                                                | AT/PA                            |
| [69]<br>Johnson 2010        | USA Regional                           | 2006-7 Four<br>urban schools                                    | Cross-sectional | 547                | Children<br>10–14 | <i>Travel:</i> questionnaire<br><i>Physical activity:</i><br>pedometer                                                                                      | Active travel to<br>school  | Physical activity<br>steps                                                                                                                                                | AT/PA                            |
| [70]<br>King 2011           | England<br>Regional                    | 2006-7 Gateshead<br>Millennium Study                            | Cross-sectional | 480                | Children<br>7+    | <i>Active travel,</i><br><i>parental variables:</i><br>Parent- completed<br>questionnaire<br><i>Physical and</i><br><i>sedentary activity:</i><br>Actigraph | Active travel to<br>school  | Child's sedentary<br>behavior<br>Parental TV /<br>screen time<br>Parental use of<br>active transport<br>Child's total and<br>moderate to<br>vigorous physical<br>activity | AT/SB<br>AT/PA                   |
| [71]<br>Kwasniewska<br>2010 | Poland<br>Nationally<br>representative | 2002-2005<br>National<br>Multicentre<br>Health Survey<br>WOBASZ | Cross-sectional | 7,280              | Adults<br>20–74   | Interviewer-<br>administered<br>questionnaire                                                                                                               | Active travel to<br>work    | Smoking<br>Leisure time<br>physical activity<br>Occupational<br>physical activity                                                                                         | AT/OHB<br>AT/PA                  |

Table S1. Cont.

| ID/1st Author/<br>Date      | Country<br>National/Regional           | Survey/Recruit<br>ment /Date of<br>Collection                          | Analysis        | Number<br>Analysed | Sample<br>Age    | Data Collection<br>Method (of<br>Behaviors Analysed<br>Together) <sup>a</sup> | Environmental<br>Behavior/s                   | Health<br>Behavior/s                                                                                                                               | Category/s<br>for this<br>Review |
|-----------------------------|----------------------------------------|------------------------------------------------------------------------|-----------------|--------------------|------------------|-------------------------------------------------------------------------------|-----------------------------------------------|----------------------------------------------------------------------------------------------------------------------------------------------------|----------------------------------|
| [72]<br>Kwasniewska<br>2010 | Poland<br>Nationally<br>representative | 2002-2005<br>National<br>Multicentre<br>Health Survey<br>WOBASZ        | Cross-sectional | 6401               | Adults<br>20–74  | Interviewer-<br>administered<br>questionnaire                                 | Active travel to<br>work                      | Smoking<br>Alcohol<br>Calorie intake                                                                                                               | AT/OHB<br>AT/PA                  |
| [73]<br>Lachapelle<br>2012  | USA<br>Regional                        | 2009 Random-<br>digit phone<br>survey                                  | Cross-sectional | 530                | Adults<br>18+    | Telephone interviews                                                          | Public transport<br>use<br>Walking to<br>work | Walking<br>frequency to<br>transport node or<br>to work                                                                                            | PT/PA<br>AT/PA                   |
| [74]<br>Landsberg 2008      | Germany<br>Regional                    | 2004-2005 Kiel<br>Obesity<br>Prevention<br>Study                       | Cross-sectional | 626                | Children<br>14   | Self-completed<br>questionnaire<br>supervised at school                       | Active travel to<br>school                    | Alcohol (habitual)<br>Smoking<br>Dietary pattern<br>Sedentary<br>behavior<br>Total physical<br>activity<br>Meeting physical<br>activity guidelines | AT/SB<br>AT/OHB<br>AT/PA         |
| [75]<br>Larouche 2011       | Canada Regional                        | 2009-10<br>Canadian<br>Assessment of<br>Physical<br>Literacy<br>(CAPL) | Cross-sectional | 315                | Children<br>9–12 | Travel: questionnaire<br>Physical activity:<br>pedometer                      | Active travel to<br>school                    | Physical activity -<br>steps                                                                                                                       | AT/PA                            |

Table S1. Cont.

| ID/1st Author/<br>Date    | Country<br>National/Regional        | Survey/Recruit<br>ment /Date of<br>Collection                        | Analysis        | Number<br>Analysed | Sample<br>Age             | Data Collection<br>Method (of Behaviors<br>Analysed Together) <sup>a</sup>                                   | Environmental<br>Behavior/s  | Health<br>Behavior/s                                                                         | Category/s<br>for this<br>Review |
|---------------------------|-------------------------------------|----------------------------------------------------------------------|-----------------|--------------------|---------------------------|--------------------------------------------------------------------------------------------------------------|------------------------------|----------------------------------------------------------------------------------------------|----------------------------------|
| [76]<br>Leslie 2010       | Australia Regional                  | 2006<br>231 Schools in<br>three states                               | Cross-sectional | 2961               | Children<br>10–14         | Questionnaire                                                                                                | Active travel to<br>school   | Meeting physical<br>activity<br>guidelines<br>Physical activity<br>outside school<br>time    | AT/PA                            |
| [77]<br>Loucaides<br>2007 | Canada Regional                     | 2000 Four urban<br>and four rural<br>schools                         | Cross-sectional | 2688               | Children<br>Mean 15       | Questionnaire                                                                                                | Active travel to<br>school   | Moderate to<br>vigorous physical<br>activity                                                 | AT/PA                            |
| [78]<br>Marques<br>2013   | Portugal<br>Regional                | 2010/2011<br>SALTA Project                                           | Cross-sectional | 636                | Children<br>11            | <i>Transport:</i><br>questionnaire<br><i>Physical activity:</i><br>accelerometer                             | Active travel<br>from school | Moderate to<br>vigorous physical<br>activity                                                 | AT/PA                            |
| [79]<br>Martin 2007       | USA<br>Nationally<br>representative | 2004 Youth<br>Media<br>Campaign<br>Longitudinal<br>Survey<br>(YMCLS) | Cross-sectional | 7,433              | Children<br>9–15<br>years | <i>Active commuting:</i><br>parent reported<br><i>Physical and Sedentary<br/>behavior:</i> child<br>reported | Active travel to<br>school   | Sedentary<br>behavior<br>Organised<br>physical activity<br>Leisure time<br>physical activity | AT/SB<br>AT/PA                   |
| [80]<br>Mendoza 2011      | USA                                 | 2003–2004<br>NHANES                                                  | Cross-sectional | 789                | 12–19                     | <i>Transport:</i><br>questionnaire<br><i>Physical activity:</i><br>accelerometer                             | Active travel to<br>school   | Moderate to<br>vigorous physical<br>activity                                                 | AT/PA                            |

Table S1. Cont.

| ID/1st Author/<br>Date        | Country<br>National/Regional | Survey/Recruit<br>ment /Date of<br>Collection                    | Analysis                 | Number<br>Analyse<br>d | Sample<br>Age       | Data Collection<br>Method (of<br>Behaviors Analysed<br>Together) <sup>a</sup> | Environmental<br>Behavior/s                                   | Health<br>Behavior/s                                | Category/s<br>for this<br>Review |
|-------------------------------|------------------------------|------------------------------------------------------------------|--------------------------|------------------------|---------------------|-------------------------------------------------------------------------------|---------------------------------------------------------------|-----------------------------------------------------|----------------------------------|
| [81]<br>Merom<br>2008         | Australia Regional           | 2003 Randomly<br>selected from<br>major<br>metropolitan<br>areas | pre/post<br>intervention | 1100                   | Adults<br>18–65     | Telephone survey                                                              | Active travel to<br>work (single day<br>and usual<br>commute) | Total physical<br>activity                          | AT/PA                            |
| [82]<br>Metcalf<br>2004       | UK<br>Regional               | (Date NR) Early<br>Bird study                                    | Cross-sectional          | 275                    | Children<br>5       | <i>Travel:</i> questionnaire<br><i>Physical activity:</i><br>accelerometer    | Walking to school                                             | Total physical<br>activity                          | AT/PA                            |
| [83]<br>Molina-García<br>2010 | Spain<br>Regional            | 2009 Two<br>universities                                         | Cross-sectional          | 518                    | Students<br>Mean 22 | Questionnaire                                                                 | Active travel to<br>the university                            | Total physical<br>activity                          | AT/PA                            |
| [84]<br>Morckel 2014          | USA<br>Multi-regional        | (date NR)<br>Random<br>selection of<br>university<br>employees   | Cross-sectional          | 99                     | Adults<br>18+       | Self-reported on-line<br>survey                                               | Public transport<br>use<br>Active travel                      | Leisure time and<br>occupation<br>physical activity | PT/PA<br>AT/PA                   |
| [85]<br>Mota 2010             | Portugal Regional            | 2006 11 urban<br>schools                                         | Cross-sectional          | 1121                   | Children<br>13–17   | Questionnaire                                                                 | Active travel from<br>school                                  | Physical activities<br>outside school<br>time       | AT/PA                            |
| [86]<br>Murtagh 2011          | Ireland Regional             | 2009 Four urban<br>schools                                       | Cross-sectional          | 140                    | Children<br>9–11    | <i>Travel:</i> questionnaire<br><i>Physical activity:</i><br>pedometer        | Active travel from<br>school                                  | Physical activity -<br>steps                        | AT/PA                            |
| [87]<br>Naumann 2009          | USA                          | (Date NR)                                                        | Cross-sectional          | 406                    | Adults<br>Over 64   | Telephone survey                                                              | Walking for short<br>journeys                                 | Walking for<br>exercise or leisure                  | AT/PA                            |

Table S1. Cont.

| ID/1st Author/<br>Date     | Country<br>National/Regional                    | Survey/Recruit<br>ment /Date of<br>Collection                        | Analysis        | Number<br>Analysed | Sample<br>Age                  | Data Collection<br>Method (of Behaviors<br>Analysed Together) <sup>a</sup>                                                                    | Environme<br>ntal<br>Behavior/s                       | Health Behavior/s                                                                                | Category/<br>s for this<br>Review |
|----------------------------|-------------------------------------------------|----------------------------------------------------------------------|-----------------|--------------------|--------------------------------|-----------------------------------------------------------------------------------------------------------------------------------------------|-------------------------------------------------------|--------------------------------------------------------------------------------------------------|-----------------------------------|
| [88]<br>Nilsson 2009       | Norway, Estonia &<br>Portugal<br>Multi-national | 1997-2000<br>European Youth<br>Heart Study                           | Cross-sectional | 1,327              | Children,<br>9 and 15<br>years | <i>Active travel and TV<br/>viewing:</i> Self-<br>completed<br>questionnaire<br><i>Sedentary time and<br/>physical activity:</i><br>pedometer | Active travel<br>to school                            | Sedentary behavior<br>Moderate to<br>vigorous physical<br>activity                               | AT/SB<br>AT/PA                    |
| [89]<br>Oreskovic 2009     | USA<br>Regional                                 | 2007-8<br>Asthmatic<br>children                                      | Cross-sectional | 176                | Children<br>5–15               | Parent completed<br>questionnaire                                                                                                             | Active travel<br>to school                            | Frequency of<br>physical activity                                                                | AT/PA                             |
| [90]<br>Østergaard<br>2012 | Denmark Regional                                | 2009 33 schools                                                      | Cross-sectional | 3847               | Children<br>12–16              | Questionnaire                                                                                                                                 | Active travel<br>to school                            | Leisure time<br>physical activity                                                                | AT/PA                             |
| [91]<br>Østergaard<br>2013 | Norway<br>Nationally<br>representative          | 2005-6 Physical<br>Activity among<br>Norwegian<br>Children Study     | Cross-sectional | 1694               | Children<br>9 and 15           | Researcher completed<br>questionnaires                                                                                                        | Active travel<br>to school                            | Leisure time<br>physical activity                                                                | AT/PA                             |
| [92]<br>Owen 2012          | England<br>Multi-regional                       | 2006-2007<br>Child Heart and<br>Heath Study in<br>England<br>(CHASE) | Cross-sectional | 2,035              | Children<br>9–10<br>years      | <i>Travel:</i> Self-completed<br>questionnaire<br><i>Activity/sedentary:</i><br>Actigraph                                                     | Active travel<br>to school<br>Public<br>transport use | Sedentary behavior<br>Total physical<br>activity<br>Moderate to<br>vigorous physical<br>activity | PT/PA<br>PT/SB<br>AT/SB<br>AT/PA  |



Table S1. Cont.

| ID/1st Author/<br>Date            | Country<br>National/Regional | Survey/Recruit<br>ment /Date of<br>Collection                                                               | Analysis        | Number<br>Analysed | Sample<br>Age     | Data Collection<br>Method (of<br>Behaviors Analysed<br>Together) <sup>a</sup>                 | Environment<br>al Behavior/s             | Health Behavior/s                                                                  | Category/s<br>for this<br>Review |
|-----------------------------------|------------------------------|-------------------------------------------------------------------------------------------------------------|-----------------|--------------------|-------------------|-----------------------------------------------------------------------------------------------|------------------------------------------|------------------------------------------------------------------------------------|----------------------------------|
| [93]<br>Pabayo 2012               | Canada<br>Regional           | 2009 Raising<br>healthy Eating<br>and Active<br>Living Kids in<br>Alberta (REAL<br>Kids Alberta)            | Cross-sectional | 688                | Children<br>10–11 | <i>Travel:</i> parent<br>completed<br>questionnaire<br><i>Physical activity:</i><br>pedometer | Active travel<br>to school               | Physical activity -<br>steps<br>Meeting physical<br>activity guidelines            | AT/PA                            |
| [94]<br>Panter 2011               | UK Regional                  | 2007-8<br>SPEEDY study                                                                                      | Cross-sectional | 1824               | Children<br>9–10  | <i>Transport:</i><br>questionnaire<br><i>Physical activity:</i><br>accelerometer              | Active travel<br>to school               | Total physical<br>activity<br>Moderate to<br>vigorous physical<br>activity         | AT/PA                            |
| [95]<br>Rissel 2013               | Australia<br>Regional        | 2012 University<br>staff and<br>students                                                                    | Cross-sectional | 3737               | Adults            | Online survey                                                                                 | Public<br>transport use<br>Active travel | Meeting physical<br>activity guidelines                                            | PT/PA<br>AT/PA                   |
| [96]<br>Robertson-<br>Wilson 2008 | Canada<br>Regional           | 2005–2006<br>School Health<br>Action,<br>Planning and<br>Evaluation<br>System<br>(SHAPES)–<br>Ontario study | Cross-sectional | 21,345             | Children<br>14–18 | Self-completed<br>questionnaire in class                                                      | Active travel<br>to school               | Smoking<br>Sedentary behavior<br>Low, moderate or<br>vigorous physical<br>activity | AT/SB<br>AT/OHB<br>AT/PA         |

Table S1. Cont.

| ID/1st Author/<br>Date  | Country<br>National/Regional       | Survey/Recruit<br>ment /Date of<br>Collection                | Analysis        | Number<br>Analysed                      | Sample<br>Age    | Data Collection<br>Method (of<br>Behaviors Analysed<br>Together) <sup>a</sup>                         | Environmental<br>Behavior/s                       | Health<br>Behavior/s                                                                                               | Category/s<br>for this<br>Review |
|-------------------------|------------------------------------|--------------------------------------------------------------|-----------------|-----------------------------------------|------------------|-------------------------------------------------------------------------------------------------------|---------------------------------------------------|--------------------------------------------------------------------------------------------------------------------|----------------------------------|
| [97]<br>Rosenberg 2006  | US Regional                        | 1990–2 Sports,<br>Play, and Active<br>Recreation for<br>Kids | Cross-sectional | 2007                                    | Children<br>9–10 | <i>Transport:</i><br>questionnaire<br><i>Physical activity:</i><br>accelerometer                      | Walking,<br>cycling<br>skateboarding to<br>school | Total physical<br>activity                                                                                         | AT/PA                            |
| [98]<br>Roth 2012       | UK<br>Nationally<br>representative | 2008 Health<br>Survey for<br>England                         | Cross-sectional | 4468<br>(603 wore<br>accelerome<br>ter) | Children<br>5–15 | <i>Transport:</i><br>questionnaire<br><i>Physical activity:</i><br>accelerometer and<br>questionnaire | Active travel to<br>school                        | Other Active<br>travel,<br>Moderate to<br>vigorous physical<br>activity<br>Meeting physical<br>activity guidelines | AT/PA                            |
| [99]<br>Sahlqvist 2013  | UK<br>Regional                     | 2010–2011<br>iConnect study                                  | Longitudinal    | 1628                                    | 18+              | Questionnaire                                                                                         | Change in<br>active travel                        | Total physical<br>activity,<br>Total leisure time<br>physical activity                                             | AT/PA                            |
| [100]<br>Sahlqvist 2012 | UK<br>Regional                     | 2010 iConnect<br>study                                       | Cross-sectional | 3339                                    | 18+              | Questionnaire                                                                                         | Active travel                                     | Total physical<br>activity<br>Leisure time<br>physical activity                                                    | AT/PA                            |
| [101]<br>Sahlqvist 2012 | Australia Regional                 | 2009<br>Queensland                                           | Cross-sectional | 1813                                    | Adults           | Questionnaire                                                                                         | Cycling for<br>transport                          | Meeting physical<br>activity guidelines                                                                            | AT/PA                            |

Table S1. Cont.

| ID/1st Author/<br>Date  | Country<br>National/Regional | Survey/Recruit<br>ment /Date of<br>Collection                 | Analysis                          | Number<br>Analysed                      | Sample<br>Age     | Data Collection<br>Method (of<br>Behaviors Analysed<br>Together) <sup>a</sup>    | Environmental<br>Behavior/s                         | Health<br>Behavior/s                                                                                                           | Category/s<br>for this<br>Review |
|-------------------------|------------------------------|---------------------------------------------------------------|-----------------------------------|-----------------------------------------|-------------------|----------------------------------------------------------------------------------|-----------------------------------------------------|--------------------------------------------------------------------------------------------------------------------------------|----------------------------------|
| [102]<br>Saksvig 2012   | US Regional                  | 2003-5 Trial of<br>Activity for<br>Adolescent<br>Girls (TAAG) | Cross-Sectional<br>& Longitudinal | 3076<br>(cross.)<br>and 1017<br>(long.) | Children<br>11–14 | <i>Transport:</i><br>questionnaire<br><i>Physical activity:</i><br>accelerometer | Walking for<br>transport before<br>and after school | Moderate to<br>vigorous physical<br>activity before<br>and after school<br>Total physical<br>activity<br>Sedentary time        | AT/PA<br>AT/SB                   |
| [103]<br>Santos 2009    | Portugal Regional            | 2006 Six urban<br>schools                                     | Cross-sectional                   | 721                                     | Children<br>13–18 | Questionnaire                                                                    | Active travel to<br>school                          | Organised<br>physical activity<br>outside of school<br>time<br>Non-organised<br>physical activity<br>outside of school<br>time | AT/PA                            |
| [104]<br>Sayers 2012    | USA Regional                 | 2007 Three<br>schools in<br>Columbia, MO                      | Cross-sectional                   | 77                                      | Children<br>5–11  | <i>Transport:</i><br>questionnaire<br><i>Physical activity:</i><br>accelerometer | Walking school<br>bus                               | Moderate to<br>vigorous physical<br>activity                                                                                   | AT/PA                            |
| [105]<br>Schofield 2005 | New Zealand<br>Regional      | (Date NR)<br>Worksites in<br>Auckland and<br>Christchurch     | Cross-sectional                   | 181                                     | Adult             | <i>Transport:</i><br>questionnaire<br><i>Physical activity:</i><br>pedometer     | Frequency of<br>active travel                       | Occupational<br>physical activity                                                                                              | AT/PA                            |

Table S1. Cont.

| ID/1st Author/<br>Date       | Country<br>National/Regional | Survey/Recruit<br>ment /Date of<br>Collection           | Analysis        | Number<br>Analysed | Sample<br>Age    | Data Collection<br>Method (of<br>Behaviors Analysed<br>Together) <sup>a</sup>                | Environmental<br>Behavior/s                                             | Health<br>Behavior/s                                                         | Category/s<br>for this<br>Review |
|------------------------------|------------------------------|---------------------------------------------------------|-----------------|--------------------|------------------|----------------------------------------------------------------------------------------------|-------------------------------------------------------------------------|------------------------------------------------------------------------------|----------------------------------|
| [106]<br>Sirard 2005         | USA<br>Regional              | (Date NR)<br>Four urban and<br>four suburban<br>schools | Cross-sectional | 219                | Children<br>9–11 | <i>Transport:</i><br>questionnaire<br><i>Physical activity:</i><br>accelerometer             | Active travel to<br>school                                              | Total physical<br>activity<br>Moderate to<br>vigorous physical<br>activity   | AT/PA                            |
| [107]<br>Sisson 2008         | USA Regional                 | 2005–2006<br>University<br>students                     | Cross-sectional | 50                 | ~21              | <i>Transport:</i> travel log<br><i>Physical activity:</i><br>accelerometer and<br>travel log | Cycling for<br>transport                                                | Physical activity -<br>steps<br>Moderate to<br>vigorous physical<br>activity | AT/PA                            |
| [108]<br>Slingerland<br>2012 | Netherlands<br>Regional      | 2009–2010<br>Three schools                              | Cross-sectional | 73                 | Children<br>15   | <i>Transport:</i> activity<br>log<br><i>Physical activity:</i><br>accelerometer              | Active travel to<br>school and<br>leisure                               | Total physical<br>activity (energy<br>expenditure)                           | AT/PA                            |
| [109]<br>Smith 2012          | UK<br>Regional               | 2007–2008<br>SPEEDY study                               | Longitudinal    | 812                | Children<br>9–10 | <i>Transport:</i><br>questionnaire<br><i>Physical activity:</i><br>accelerometer             | Active travel to<br>school                                              | Moderate to<br>vigorous physical<br>activity                                 | AT/PA                            |
| [110]<br>Smith 2012          | UK<br>Regional               | 2007–2008<br>SPEEDY study                               | Cross-sectional | 1859               | Children<br>9–10 | <i>Transport:</i><br>questionnaire<br><i>Physical activity:</i><br>accelerometer             | Active travel to<br>school<br>Active travel to<br>other<br>destinations | Moderate to<br>vigorous physical<br>activity                                 | AT/PA                            |

Table S1. Cont.

| ID/1st Author/<br>Date   | Country<br>National/Regional | Survey/Recruit<br>ment /Date of<br>Collection                         | Analysis        | Number<br>Analysed | Sample<br>Age     | Data Collection<br>Method (of<br>Behaviors Analysed<br>Together) <sup>a</sup>                       | Environmental<br>Behavior/s | Health<br>Behavior/s                                                                            | Category/s<br>for this<br>Review |
|--------------------------|------------------------------|-----------------------------------------------------------------------|-----------------|--------------------|-------------------|-----------------------------------------------------------------------------------------------------|-----------------------------|-------------------------------------------------------------------------------------------------|----------------------------------|
| [111]<br>Spinks 2006     | Australia<br>Regional        | 2001 & 2003<br>Childhood<br>Injury<br>Prevention<br>Study (CHIPS)     | Cross-sectional | 518                | Children<br>5–12  | <i>Transport:</i> interview<br><i>Physical activity:</i><br>diary                                   | Active travel to<br>school  | Meeting physical<br>activity guidelines                                                         | AT/PA                            |
| [112]<br>Sugiyama 2010   | Australia<br>Regional        | 2003-2004<br>Random sample<br>of households in<br>study area          | Cross-sectional | 1524               | Adults<br>20–65   | Self-completed<br>questionnaire                                                                     | Active travel               | Sedentary<br>behavior<br>Leisure time<br>physical activity<br>Occupational<br>physical activity | AT/SB<br>AT/PA                   |
| [113]<br>van Sluijs 2009 | UK<br>Regional               | 2002–2004<br>Avon<br>Longitudinal<br>Study of Parents<br>and Children | Cross-sectional | 4688               | Children<br>11    | <i>Transport:</i> carer<br>completed<br>questionnaire<br><i>Physical activity:</i><br>accelerometer | Active travel to<br>school  | Total physical<br>activity                                                                      | AT/PA                            |
| [114]<br>Voss 2010       | UK<br>Regional               | 2007-8 East of<br>England<br>Healthy Hearts<br>study                  | Cross-sectional | 6085               | Children<br>10–15 | Questionnaire                                                                                       | Active travel to<br>school  | Total physical<br>activity                                                                      | AT/PA                            |
| [115]<br>Wen 2010        | Australia<br>Regional        | 2006 Central<br>Sydney Walk to<br>School Research<br>Program          | Cross-sectional | 1362               | Children<br>10–13 | Parent-completed<br>questionnaire                                                                   | Active travel to<br>school  | Sedentary<br>behavior<br>Physical activity                                                      | AT/SB<br>AT/PA                   |

Table S1. Cont.

| ID/1st Author/<br>Date                                                                   | Country<br>National/Regional              | Survey/Recruit<br>ment /Date of<br>Collection         | Analysis        | Number<br>Analysed | Sample<br>Age              | Data Collection<br>Method (of<br>Behaviors Analysed<br>Together) <sup>a</sup>    | Environmental<br>Behavior/s | Health<br>Behavior/s                         | Category/s<br>for this<br>Review |
|------------------------------------------------------------------------------------------|-------------------------------------------|-------------------------------------------------------|-----------------|--------------------|----------------------------|----------------------------------------------------------------------------------|-----------------------------|----------------------------------------------|----------------------------------|
| [116] Yang<br>2012                                                                       | UK<br>Regional                            | 2009 Travel and<br>Health in<br>Cambridge             | Cross-sectional | 475                | 16+                        | <i>Transport:</i><br>questionnaire<br><i>Physical activity:</i><br>accelerometer | Active travel to<br>work    | Moderate to<br>vigorous<br>physical activity | AT/PA                            |
| [117] Yelavich<br>2008                                                                   | New Zealand<br>Regional                   | 2004<br>39 schools                                    | Cross-sectional | 1006               | Children<br>5–11           | Parent completed<br>questionnaire                                                | Walking to<br>school        | Total physical<br>activity                   | AT/PA                            |
| <b>Active Travel and Sedentary Behavior or other Health Behaviors not Included Above</b> |                                           |                                                       |                 |                    |                            |                                                                                  |                             |                                              |                                  |
| [118] Chau<br>2012                                                                       | Australia<br>Nationally<br>representative | 2007, 2008<br>Australian<br>National Health<br>Survey | Cross-sectional | 10,785             | 15–69                      | Interviews using<br>computer assisted<br>questionnaire                           | Active travel               | Occupational<br>sedentary<br>activity        | AT/SB                            |
| [119] Dunton<br>2009                                                                     | USA<br>Nationally<br>representative       | 2006 American<br>Time Use<br>Survey                   | Cross-sectional | 10,984             | 21+                        | Interviewers using<br>computer assisted<br>telephone interview                   | Active travel               | Sedentary<br>behavior                        | AT/SB                            |
| [120] Granzin<br>1991                                                                    | USA<br>Regional                           | (year NR)                                             | Cross-sectional | 340                | Adults                     | Self-completed<br>survey in interviewer<br>presence                              | Recycling<br>Active travel  | Sedentary<br>behavior                        | AT/SB<br>Rec/HB                  |
| [121] Mota<br>2007                                                                       | Portugal<br>Regional                      | 2004 from 11<br>public schools                        | Cross-sectional | 705                | Children<br>12–17<br>years | Self-completed<br>questionnaire in class                                         | Active travel               | Sedentary<br>behavior                        | AT/SB                            |

Table S1. Cont.

| ID/1st Author/<br>Date                                           | Country<br>National/Regional                                   | Survey/Recruit<br>ment /Date of<br>Collection                                                        | Analysis        | Number<br>Analysed       | Sample<br>Age     | Data Collection<br>Method (of<br>Behaviors Analysed<br>Together) <sup>a</sup> | Environmental<br>Behavior/s                                                                         | Health<br>Behavior/s                                                                                    | Category/s<br>for this<br>Review |
|------------------------------------------------------------------|----------------------------------------------------------------|------------------------------------------------------------------------------------------------------|-----------------|--------------------------|-------------------|-------------------------------------------------------------------------------|-----------------------------------------------------------------------------------------------------|---------------------------------------------------------------------------------------------------------|----------------------------------|
| [122]<br>Wong 2011                                               | Canada<br>Regional                                             | 2009 Ontario<br>Student Drug<br>Use and Health<br>Survey<br>(OSDUHS)                                 | Cross-sectional | 3633                     | Children<br>12–18 | Self-completed<br>questionnaire in class                                      | Active travel to<br>school                                                                          | Smoking<br>Drinking<br>alcohol<br>Sedentary<br>behavior<br>Moderate to<br>vigorous<br>physical activity | AT/SB<br>AT/OHB                  |
| [123]<br>Wang 2010                                               | Finland<br>Multi-regional                                      | 1972-2002<br>Every five years<br>population<br>surveys                                               | Cross-sectional | 58,208                   | Adults<br>25–74   | Self-completed<br>questionnaire                                               | Active travel to<br>work                                                                            | Alcohol use<br>Smoking                                                                                  | AT/OHB                           |
| <b>Public Transport and Physical Activity Not Included Above</b> |                                                                |                                                                                                      |                 |                          |                   |                                                                               |                                                                                                     |                                                                                                         |                                  |
| [124]<br>Besser 2005                                             | USA<br>Sub-sample of<br>nationally<br>representative<br>survey | 2001 National<br>Household<br>Travel Survey<br>(NHTS)                                                | Cross-sectional | 3312<br>transit<br>users | Adults<br>18+     | Telephone interview                                                           | Public transport<br>use                                                                             | Walking to<br>transit node                                                                              | PT/PA                            |
| [125]<br>Cerin 2007                                              | Australia<br>Regional                                          | (year NR)<br>Physical<br>Activity in<br>Localities and<br>Community<br>Environments<br>(PLACE) study | Cross-sectional | 2650                     | Adults<br>20–65   | Self- completed<br>questionnaire                                              | Public transport<br>use<br>(assumed from<br>frequency of<br>walking to<br>public transport<br>node) | Walking for<br>transport (mins)                                                                         | PT/PA                            |

Table S1. Cont.

| ID/1st Author/<br>Date      | Country<br>National/Regional                | Survey/Recruit<br>ment /Date of<br>Collection                                                                           | Analysis                                | Number<br>Analysed       | Sample<br>Age   | Data Collection<br>Method (of<br>Behaviors Analysed<br>Together) <sup>a</sup>                                         | Environmental<br>Behavior/s              | Health<br>Behavior/s                                                     | Category/s<br>for this<br>Review |
|-----------------------------|---------------------------------------------|-------------------------------------------------------------------------------------------------------------------------|-----------------------------------------|--------------------------|-----------------|-----------------------------------------------------------------------------------------------------------------------|------------------------------------------|--------------------------------------------------------------------------|----------------------------------|
| [126]<br>Dolnicar 2010      | Switzerland<br>Nationally<br>representative | 2004 Panel of<br>residents                                                                                              | Cross-sectional<br>(year long<br>study) | 3050<br>(4,471<br>trips) | Adults          | Self- completed<br>questionnaire<br>and logs                                                                          | Travel mode<br>to tourist<br>destination | Active pursuits on<br>the trip<br>Bicycling for<br>transport on the trip | PT/PA                            |
| [127]<br>Edwards 2008       | USA<br>Nationally<br>representative         | 2001 National<br>Household<br>Travel Survey                                                                             | Cross-sectional                         | 28,711                   | Adults<br>18+   | Travel diaries<br>reported at interview                                                                               | Public<br>transport use                  | Walking time                                                             | PT/PA                            |
| [128]<br>Goetzke 2011       | Germany<br>Multi-regional                   | 2002 Mobility<br>in Germany<br>(MiG)                                                                                    | Cross-sectional                         | 3,821                    | 15+             | NR                                                                                                                    | Public<br>transport use                  | Active travel to<br>school/work                                          | PT/PA                            |
| [129]<br>Lachapelle<br>2011 | USA<br>Multi-regional                       | 2003 The<br>Neighborhood<br>Quality of Life<br>Study (NQLS)                                                             | Cross-sectional                         | 1,237                    | Adults<br>20–65 | <i>Transit use:</i><br>Interviewer-<br>administered<br>questionnaire<br><i>Physical activity:</i><br>Accelerometer    | Public<br>transport use                  | Moderate physical<br>activity<br>Meeting physical<br>activity guidelines | PT/PA                            |
| [130]<br>Lachapelle<br>2009 | USA<br>Regional                             | 2001-2002<br>Strategies for<br>Metropolitan<br>Atlanta's<br>Regional<br>Transportation<br>and Air Quality<br>(SMARTRAQ) | Cross-sectional                         | 4156                     | Adults<br>16–70 | <i>Travel mode:</i> 2-day<br>travel diary via<br>computer assisted<br>telephone call<br><i>Physical activity:</i> GIS | Public<br>transport use                  | Moderate physical<br>activity<br>Meeting physical<br>activity guidelines | PT/PA                            |



Table S1. Cont.

| ID/1st Author/<br>Date      | Country<br>National/Regional | Survey/Recruit<br>ment /Date of<br>Collection                                                              | Analysis         | Number<br>Analysed | Sample<br>Age | Data Collection<br>Method (of<br>Behaviors Analysed<br>Together) <sup>a</sup>           | Environmental<br>Behavior/s | Health<br>Behavior/s                                              | Category/s<br>for this<br>Review |
|-----------------------------|------------------------------|------------------------------------------------------------------------------------------------------------|------------------|--------------------|---------------|-----------------------------------------------------------------------------------------|-----------------------------|-------------------------------------------------------------------|----------------------------------|
| [131]<br>Lee 2007           | USA<br>Regional              | 2002 Walkable<br>and Bikable<br>Communities                                                                | Cross-sectional  | 438                | Adults        | Telephone Survey                                                                        | Public transport<br>use     | Active travel                                                     | PT/PA                            |
| [132]<br>MacDonald<br>2010  | USA<br>Regional              | 2006–2007 and<br>2008–2009<br>Sample<br>addresses within<br>mile of<br>proposed light<br>rail transit line | Before and after | 660                | Adults        | Telephone interview                                                                     | Public transport<br>use     | Walking activity<br>Vigorous physical<br>activity                 | PT/PA                            |
| [133]<br>Moudon 2005        | USA<br>Regional              | 2002 Walkable<br>and Bikable<br>Communities<br>(WBC) project                                               | Cross-sectional  | 608                | Adults<br>18+ | Telephone interview                                                                     | Public transport<br>use     | Cycling                                                           | PT/PA                            |
| [134]<br>Villanueva<br>2008 | Australia<br>Regional        | 2006<br>Convenience<br>sample of<br>University<br>students                                                 | Cross-sectional  | 103                | Adults<br>16+ | Self-completed<br>questionnaire and<br>activity log<br><i>Step counts:</i><br>Pedometer | Public transport<br>use     | Physical activity –<br>steps<br>Leisure time<br>physical activity | PT/PA                            |
| [135] Wasfi                 | Canada<br>Regional           | 2003 Origin-<br>Destination<br>(OD) Survey                                                                 | Cross-sectional  | 6913               | Adults<br>18+ | Telephone interview                                                                     | Public transport<br>mode    | Walking                                                           | PT/PA                            |

Table S1. Cont.

| ID/1st Author/<br>Date                                  | Country<br>National/Regional | Survey/Recruit<br>ment /Date of<br>Collection                        | Analysis        | Number<br>Analysed | Sample<br>Age     | Data Collection<br>Method (of<br>Behaviors Analysed<br>Together) <sup>a</sup>                                | Environmental<br>Behavior/s | Health<br>Behavior/s                         | Category/s<br>for this<br>Review |
|---------------------------------------------------------|------------------------------|----------------------------------------------------------------------|-----------------|--------------------|-------------------|--------------------------------------------------------------------------------------------------------------|-----------------------------|----------------------------------------------|----------------------------------|
| [136]<br>Wener 2007                                     | USA<br>Regional              | (date NR)<br>Convenience<br>sample of<br>regular<br>commuters        | Cross-sectional | 177                | Adults            | Self-completed<br>questionnaire<br><i>Step counts:</i><br>Pedometer                                          | Public transport<br>use     | Physical activity<br>Steps<br>Minutes walked | PT/PA                            |
| [137]<br>Fuller 2013                                    | USA<br>Regional              | 2006<br>Philadelphia<br>Neighborhood<br>Food<br>Environment<br>Study | Cross-sectional | 1266               | Adults            | Self-completed<br>questionnaire                                                                              | Transport mode              | Fruit and<br>vegetable<br>consumption        | PT/OHB                           |
| <b>Car Use and Physical Activity Not Included Above</b> |                              |                                                                      |                 |                    |                   |                                                                                                              |                             |                                              |                                  |
| [138] Lemstra<br>2013                                   | Canada<br>Regional           | 2010 Tribal<br>community<br>survey                                   | Cross-sectional | 204                | Children<br>10–16 | Parental-completed<br>questionnaire                                                                          | Car transport by<br>parent  | Meeting physical<br>activity guidelines      | CU/PA                            |
| [139] Swanson<br>2012                                   | Canada<br>Regional           | 2007 Random<br>sample from<br>telephone book                         | Cross-sectional | 1026               | Adults<br>18+     | <i>Physical activity:</i><br>telephone interview<br><i>Driving time:</i> self-<br>completed<br>questionnaire | Weekly driving<br>time      | Meeting physical<br>activity guidelines      | CU/PA                            |
| [140] Wen<br>2006                                       | Australia<br>Regional        | 2003 The New<br>South Wales<br>(NSW)<br>Continuous<br>Health Survey  | Cross-sectional | 6810               | Adults<br>16+     | Telephone interview                                                                                          | Car use                     | Meeting physical<br>activity guidelines      | CU/PA                            |

Table S1. Cont.

| ID/1st Author/<br>Date                    | Country<br>National/Regional | Survey/Recruitment /Date of<br>Collection                      | Analysis                                                                         | Number<br>Analysed | Sample Age               | Data<br>Collection<br>Method (of<br>Behaviors<br>Analysed<br>Together) <sup>a</sup> | Environmental<br>Behavior/s                                                      | Health<br>Behavior/s                                   | Category/s for<br>this Review |
|-------------------------------------------|------------------------------|----------------------------------------------------------------|----------------------------------------------------------------------------------|--------------------|--------------------------|-------------------------------------------------------------------------------------|----------------------------------------------------------------------------------|--------------------------------------------------------|-------------------------------|
| <b>Car Use and Other Health Behaviors</b> |                              |                                                                |                                                                                  |                    |                          |                                                                                     |                                                                                  |                                                        |                               |
| [141]<br>Wennburg 2010                    | Sweden<br>Regional           | 1985–1999<br>Vasterbotten<br>Intervention<br>Program           | Cross-sectional<br>analysis in a<br>prospective<br>nested case-<br>control study | 531                | Adults<br>30–60          | Self-completed<br>questionnaire                                                     | Car use                                                                          | Smoking                                                | CU/OHB                        |
| <b>Organic Food</b>                       |                              |                                                                |                                                                                  |                    |                          |                                                                                     |                                                                                  |                                                        |                               |
| [142]<br>Kesse-Guyot<br>2013              | France<br>National           | 2009–2011<br>Nutrinet-Santé<br>cohort                          | Cross-sectional                                                                  | 54,311             | Adults<br>18+            | Internet survey                                                                     | Organic<br>food<br>consumption                                                   | Dietary<br>composition<br>Physical activity<br>Smoking | OF                            |
| [143]<br>Magnusson<br>2003                | Sweden<br>National           | 1998 Random<br>sample                                          | Cross-sectional                                                                  | 1154               | Adults<br>18–65          | Self-completed<br>questionnaire                                                     | Environmentally<br>friendly<br>behavior                                          | Frequency of<br>organic food<br>purchase               | OF                            |
| [144]<br>Miao 2013                        | USA<br>Regional              | (date NR)<br>Random<br>selection of<br>university<br>employees | Cross-sectional                                                                  | 1185               | Adults<br>21–83<br>years | Self-completed<br>questionnaire                                                     | Purchase<br>refillable<br>products<br>Purchase<br>bio-<br>degradable<br>products | Purchase organic<br>food                               | OF                            |

Table S1. Cont.

| ID/1st Author/<br>Date  | Country<br>National/Regional | Survey/Recruitment /Date of<br>Collection                            | Analysis        | Number<br>Analysed | Sample Age        | Data<br>Collection<br>Method (of<br>Behaviors<br>Analysed<br>Together) <sup>a</sup>                                 | Environmental<br>Behavior/s                           | Health<br>Behavior/s                                                                                                                           | Category/s for<br>this Review |
|-------------------------|------------------------------|----------------------------------------------------------------------|-----------------|--------------------|-------------------|---------------------------------------------------------------------------------------------------------------------|-------------------------------------------------------|------------------------------------------------------------------------------------------------------------------------------------------------|-------------------------------|
| [145]<br>Nie 2011       | USA<br>National              | 2003 A food<br>consumer<br>survey                                    | Cross-sectional | 956                | Adults<br>18+     | NR                                                                                                                  | Shopping at<br>farmers<br>markets                     | Buying organic<br>Cooking<br>Following a special<br>diet                                                                                       | OF<br>LF                      |
| [146]<br>Petersen 2013  | Denmark<br>National          | 1996–2002<br>Danish National<br>Birth Cohort                         | Cross-sectional | 60,773             | Pregnant<br>women | Food and other data<br>from a mailed food<br>frequency<br>questionnaire, other<br>data from telephone<br>interviews | Organic<br>food use                                   | Smoking<br>Alcohol<br>Eating meat<br>Vegetarian / vegan<br>Physical activity<br>Eating specific<br>foods<br>Nutrient intake<br>Dietary pattern | OF                            |
| [147]<br>Thogersen 2006 | Denmark<br>National          | 1998–2000<br>Random sample<br>of consumers                           | Cross-sectional | 1100               | Adults<br>18+     | Telephone interview                                                                                                 | Public<br>transport use<br>Active travel<br>Recycling | Buy organic food                                                                                                                               | OF                            |
| [148]<br>Torjusen 2010  | Norway<br>National           | 2002–2007<br>Norwegian<br>Mother and<br>Child Cohort<br>Study (MoBa) | Cross-sectional | 63,561             | Pregnant<br>women | Self-completed<br>questionnaires                                                                                    | Organic<br>food use                                   | Vegetarianism<br>Physical activity<br>Smoking<br>Alcohol use                                                                                   | OF                            |

Table S1. Cont.

| ID/1st Author/<br>Date                         | Country<br>National/Regional | Survey/Recruit<br>ment /Date of<br>Collection                                                                                                    | Analysis        | Number<br>Analysed | Sample<br>Age     | Data Collection<br>Method (of Behaviors<br>Analysed Together) <sup>a</sup> | Environmental<br>Behavior/s                    | Health<br>Behavior/s                                                                                | Category/s<br>for this<br>Review |
|------------------------------------------------|------------------------------|--------------------------------------------------------------------------------------------------------------------------------------------------|-----------------|--------------------|-------------------|----------------------------------------------------------------------------|------------------------------------------------|-----------------------------------------------------------------------------------------------------|----------------------------------|
| [149] Torjusen<br>2012                         | Norway<br>National           | 2002-2007<br>Norwegian<br>Mother and<br>Child Cohort<br>Study (MoBa)                                                                             | Cross-sectional | 63,808             | Pregnant<br>women | Self-completed<br>questionnaires                                           | Organic food<br>use                            | Vegetarianism<br>Dietary<br>components<br>Energy intake                                             | OF                               |
| <b>Locally Sourced Food Not Included Above</b> |                              |                                                                                                                                                  |                 |                    |                   |                                                                            |                                                |                                                                                                     |                                  |
| [150] Burgess<br>2009                          | Australia<br>Regional        | 2005 Aboriginal<br>Indigenous<br>residents in a<br>remote<br>community<br>recruited via an<br>outreach<br>preventive<br>health checks<br>program | Cross-sectional | 298                | Adults<br>15–54   | Interviewer-<br>administered<br>questionnaire                              | Caring for the<br>community<br>composite score | Smoking<br>Drinking<br>alcohol<br>Exercise<br>frequency<br>Consumption of<br>store and bush<br>food | LF                               |
| [151] Litt 2011                                | USA<br>Regional              | 2006-2007<br>random sample<br>households and<br>community<br>gardens                                                                             | Cross-sectional | 436                | Adults<br>18+     | Interview                                                                  | Gardening<br>participation                     | Fruit and<br>vegetable<br>consumption                                                               | LF                               |

Table S1. Cont.

| ID/1st Author/<br>Date                  | Country<br>National/Regional | Survey/Recruit<br>ment /Date of<br>Collection                                      | Analysis                          | Number<br>Analysed                       | Sample<br>Age   | Data Collection<br>Method (of Behaviors<br>Analysed Together) <sup>a</sup>                                                                                                                                                                                               | Environmental<br>Behavior/s                                     | Health<br>Behavior/s                                                 | Category/s<br>for this<br>Review |
|-----------------------------------------|------------------------------|------------------------------------------------------------------------------------|-----------------------------------|------------------------------------------|-----------------|--------------------------------------------------------------------------------------------------------------------------------------------------------------------------------------------------------------------------------------------------------------------------|-----------------------------------------------------------------|----------------------------------------------------------------------|----------------------------------|
| [152]<br>MacMillan<br>Uribe 2012        | USA<br>Regional              | 2009<br>Convenience<br>sample of CSA<br>members                                    | Retrospective<br>before and after | 115                                      | Adults<br>18+   | Online survey                                                                                                                                                                                                                                                            | Previous<br>Community<br>Supported<br>Agriculture<br>membership | Fruit and<br>vegetable intake                                        | LF                               |
| [153]<br>Maples 2013                    | USA<br>Multi-regional        | 2012 Sample of<br>urban<br>individuals<br>responsible for<br>household<br>shopping | Cross-sectional                   | 1023                                     | Adults<br>18+   | Online survey                                                                                                                                                                                                                                                            | Buying directly<br>from producers                               | Walking<br>activity level                                            | LF                               |
| <b>Plate Waste and Health Behaviors</b> |                              |                                                                                    |                                   |                                          |                 |                                                                                                                                                                                                                                                                          |                                                                 |                                                                      |                                  |
| [155]<br>Baik 2009                      | South Korea<br>Regional      | 2008–2009 Five<br>elementary<br>schools in a<br>rural province                     | Cross-sectional                   | 407 parent<br>reported<br>91<br>observed | Children<br>6–9 | <i>Plate waste:</i> Parent<br>completed<br>questionnaire; weighed<br>observation at school<br>(sub-sample)<br><i>Health behaviors:</i><br>Parent completed<br>questionnaire<br><i>Step count:</i> 5-day<br>Pedometer<br>Assessed for adherence<br>to National Guidelines | Plate waste                                                     | Dietary<br>composition<br>Meeting<br>physical activity<br>guidelines | PW/HB                            |

Table S1. Cont.

| ID/1st Author/<br>Date | Country<br>National/Regional | Survey/Recruit<br>ment /Date of<br>Collection | Analysis        | Number<br>Analysed | Sample<br>Age              | Data Collection<br>Method (of Behaviors<br>Analysed Together) <sup>a</sup> | Environmental<br>Behavior/s | Health<br>Behavior/s                                             | Category/s<br>for this<br>Review |
|------------------------|------------------------------|-----------------------------------------------|-----------------|--------------------|----------------------------|----------------------------------------------------------------------------|-----------------------------|------------------------------------------------------------------|----------------------------------|
| [156] Marlette<br>2005 | USA<br>Regional              | 2002 From three<br>middle schools             | Cross-sectional | 743                | Children<br>11–12<br>years | Weighing plate waste,<br>observing competitive<br>food item purchase       | Plate waste                 | Competitive<br>food item<br>purchase e.g.<br>unhealthy<br>snacks | PW/HB                            |

<sup>a</sup>Self reported unless otherwise stated; NR not reported; GIS Geographic Information Systems; CSA community supported agriculture; Key to categories for this review: AT/SB Active transportation (walking or cycling) and sedentary behaviour; AT/OHB Active transportation (walking or cycling) and other health behaviour (smoking, alcohol use, diet); PT/PA Public transportation and physical activity; PT/OHB Public transportation and other health behaviour (smoking, alcohol use, diet); CU/PA Car use and physical activity; CU/OHB Car use and other health behaviour (smoking, alcohol use, diet); OF Organic food and any other environmental or health behaviour; LF Local food and any other environmental or health behaviour; PW/HB Plate waste and any health behaviour; Rec/HB Recycling and any health behaviour. The full references for these papers can be found in the main article

**Table S2.** Description of systematic reviews included in the scoping review of bivariate analyses of health and environmental behaviors in observational studies.

| ID/1 <sup>st</sup><br>Author/Date | Inclusion Criteria                                                                                                                                                                                  | Number of Studies in Reviews Meeting<br>Our Search Criteria (Analysing<br>Relationship between Health and<br>Environmental Behavior(s) in OECD<br>Countries) | Environmental<br>Behavior/s | Health Behavior/s                          | Notes                                                                                                                                                                           |
|-----------------------------------|-----------------------------------------------------------------------------------------------------------------------------------------------------------------------------------------------------|--------------------------------------------------------------------------------------------------------------------------------------------------------------|-----------------------------|--------------------------------------------|---------------------------------------------------------------------------------------------------------------------------------------------------------------------------------|
| [8]<br>Faulkner<br>2009           | All study designs<br>English language<br>Children 5–18<br>Active travel as exposure<br>variable<br>Objective measures of<br>physical activity and/or body<br>weight                                 | 11                                                                                                                                                           | Active travel               | Physical activity                          | 13 studies found in total, all examined associations between active travel and physical activity. Two studies from non-OECD countries.                                          |
| [9]<br>Lee 2008                   | All study designs<br>Children (any age below<br>university)<br>Active commuting to school<br>as exposure<br>Physical activity or body<br>weight as outcome(s)                                       | 23                                                                                                                                                           | Active travel               | Physical activity                          | 32 studies were identified, 25 examined active commuting and physical activity, 18 examined active commuting and weight status. Two AT/PA studies from non-OECD countries.      |
| [10]<br>Schoeppe<br>2013          | Observational studies<br>English language<br>Children 3-18<br>Active travel or independent<br>mobility as exposure(s)<br>Physical activity, sedentary<br>behavior or weight status as<br>outcome(s) | 44                                                                                                                                                           | Active travel               | Sedentary<br>behavior<br>Physical activity | 52 studies found in total, 42 examined active travel and physical activity and five examined active travel and sedentary behavior. Three AT/PA studies from non-OECD countries. |



Table S2. Cont.

| ID/1 <sup>st</sup><br>Author/Date | Inclusion Criteria                                                                                                                                                                                                                                       | Number of Studies in Reviews Meeting<br>Our Search Criteria (Analysing<br>Relationship between Health and<br>Environmental Behavior(s) in OECD<br>Counties) | Environmental<br>Behavior/s                                         | Health Behavior/s             | Notes                                                                                                                                                                                                                    |
|-----------------------------------|----------------------------------------------------------------------------------------------------------------------------------------------------------------------------------------------------------------------------------------------------------|-------------------------------------------------------------------------------------------------------------------------------------------------------------|---------------------------------------------------------------------|-------------------------------|--------------------------------------------------------------------------------------------------------------------------------------------------------------------------------------------------------------------------|
| [11]<br>Wanner 2012               | All study designs<br>Published in English, German<br>or French<br>Adults<br>Published up to October 2010<br>Active transportation as<br>exposure variable<br>Physical activity or body<br>weight as outcome(s)<br>Published in peer-reviewed<br>journals | 14                                                                                                                                                          | Active travel                                                       | Physical activity             | 46 articles based on 36 unique studies found<br>which examined active travel and physical<br>activity (17 articles) and active travel and body<br>weight (38 articles). Three AT/PA articles from<br>non-OECD countries. |
| [12]<br>Rissel 2012               | All study designs<br>Published 2002–2012<br>Adults                                                                                                                                                                                                       | 8                                                                                                                                                           | Public transport                                                    | Physical activity             | 18 articles were included in an appendix that<br>examined other aspects e.g. public transport<br>and BMI, ease of access to public transport and<br>physical activity                                                    |
| [154]<br>Kamphuis<br>2006         | Observational studies<br>English language<br>Published 1980–2004<br>Population based<br>Age 18–60 years<br>Established market economy<br>Fruit and vegetable intake as<br>outcome variable                                                               | 4                                                                                                                                                           | Locally grown<br>food<br>Vegetable<br>garden/home-<br>grown produce | Fruit and vegetable<br>intake | 24 studies found in total which examined<br>factors external to the individual that<br>determined fruit and vegetable intake                                                                                             |

The full references for these papers can be found in the main article

## Referenses

26. Abbott, R.A.; Macdonald, D.; Nambiar, S.; Davies, P.S.W. The association between walking to school, daily step counts and meeting step targets in 5- to 17-year-old Australian children. *Pediatr. Exerc. Sci.* **2009**, *21*, 520–532.
27. Alexander, L.M.; Inchley, J.; Todd, J.; Currie, D.; Cooper, A.R.; Currie, C. The broader impact of walking to school among adolescents: Seven day accelerometry based study. *BMJ Br. Med. J.* **2005**, *331*, 1061–1062.
28. Andersen, L.B.; Lawlor, D.A.; Cooper, A.R.; Froberg, K.; Anderssen, S.A. Physical fitness in relation to transport to school in adolescents: The Danish youth and sports study. *Scand. J. Med. Sci. Sports* **2009**, *19*, 406–411.
29. Andersen, L.B.; Wedderkopp, N.; Kristensen, P.; Moller, N.C.; Froberg, K.; Cooper, A.R. Cycling to school and cardiovascular risk factors: A longitudinal study. *J. Phys. Act. Health* **2011**, *8*, 1025–1033.
30. Baig, F.; Hameed, M.; Li, M.; Shorthouse, G.; Roalfe, A.; Daley, A. Association between active commuting to school, weight and physical activity status in ethnically diverse adolescents predominately living in deprived communities. *Public Health* **2009**, *123*, 39–41.
31. Borrestad, L.A.B.; Ostergaard, L.; Andersen, L.B.; Bere, E. Associations between active commuting to school and objectively measured physical activity. *J. Phys. Act. Health* **2013**, *10*, 826–832.
32. Brophy, S.; Cooksey, R.; Lyons, R.A.; Thomas, N.E.; Rodgers, S.E.; Gravenor, M.B. Parental factors associated with walking to school and participation in organised activities at age 5: Analysis of the Millennium Cohort Study. *BMC Public Health* **2011**, *11*, doi:10.1186/1471-2458-11-14.
33. Butler, G.P.; Orpana, H.M.; Wiens, A.J. By your own two feet—Factors associated with active transportation in Canada. *Can. J. Public Health* **2007**, *98*, 259–264.
34. Carse, A.; Goodman, A.; Mackett, R.L.; Panter, J.; Ogilvie, D. The factors influencing car use in a cycle-friendly city: The case of Cambridge. *J. Transp. Geogr.* **2013**, *28*, 67–74.
35. Carver, A.; Timperio, A.F.; Hesketh, K.D.; Ridgers, N.D.; Salmon, J.L.; Crawford, D.A. How is active transport associated with children’s and adolescents’ physical activity over time? *Int. J. Behav. Nutr. Phys. Act.* **2011**, *8*, doi:10.1186/1479-5868-8-126.
36. Cerin, E.; Leslie, E.; Owen, N. Explaining socio-economic status differences in walking for transport: An ecological analysis of individual, social and environmental factors. *Soc. Sci. Med.* **2009**, *68*, 1013–1020.
37. Chillon, P.; Ortega, F.B.; Ruiz, J.R.; De Bourdeaudhuij, I.; Martinez-Gomez, D.; Vicente-Rodriguez, G.; Widhalm, K.; Molnar, D.; Gottrand, F.; Gonzalez-Gross, M.; *et al.* Active commuting and physical activity in adolescents from Europe: Results from the Helena study. *Pediatr. Exerc. Sci.* **2011**, *23*, 207–217.
38. Chillon, P.; Ortega, F.B.; Ruiz, J.R.; Veidebaum, T.; Oja, L.; Maestu, J.; Sjostrom, M. Active commuting to school in children and adolescents: An opportunity to increase physical activity and fitness. *Scand. J. Public Health* **2010**, *38*, 873–879.
39. Cooper, A.R.; Andersen, L.B.; Wedderkopp, N.; Page, A.S.; Froberg, K. Physical activity levels of children who walk, cycle, or are driven to school. *Am. J. Prev. Med.* **2005**, *29*, 179–184.

40. Cooper, A.R.; Page, A.S.; Foster, L.J.; Qahwaji, D. Commuting to school—Are children who walk more physically active? *Amer. J. Prev. Med.* **2003**, *25*, 273–276.
41. Cooper, A.R.; Jago, R.; Southward, E.F.; Page, A.S. Active travel and physical activity across the school transition: The peach project. *Med. Sci. Sports Exerc.* **2012**, *44*, 1890–1897.
42. Cooper, A.R.; Page, A.S.; Wheeler, B.W.; Griew, P.; Davis, L.; Hillsdon, M.; Jago, R. Mapping the walk to school using accelerometry combined with a global positioning system. *Amer. J. Prev. Med.* **2010**, *38*, 178–183.
43. Cooper, A.R.; Wedderkopp, N.; Jago, R.; Kristensen, P.L.; Moller, N.C.; Froberg, K.; Page, A.S.; Andersen, L.B. Longitudinal associations of cycling to school with adolescent fitness. *Prev. Med.* **2008**, *47*, 324–328.
44. Cooper, A.R.; Wedderkopp, N.; Wang, H.; Andersen, L.B.; Froberg, K.; Page, A.S. Active travel to school and cardiovascular fitness in danish children and adolescents. *Med. Sci. Sports Exerc.* **2006**, *38*, 1724–1731.
45. Daly-Smith, A.J.W.; McKenna, J.; Radley, D.; Long, J. The impact of additional weekdays of active commuting to school on children achieving a criterion of 300+minutes of moderate-to-vigorous physical activity. *Health Educ. J.* **2011**, *70*, 428–434.
46. Davis, M.G.; Fox, K.R.; Hillsdon, M.; Coulson, J.C.; Sharp, D.J.; Stathi, A.; Thompson, J.L. Getting out and about in older adults: The nature of daily trips and their association with objectively assessed physical activity. *Int. J. Behav. Nutr. Phys. Act.* **2011**, *8*, doi:10.1186/1479-5868-8-116.
47. de Bruijn, G.J.; Kremers, S.P.J.; Singh, A.; van den Putte, B.; van Mechelen, W. Adult active transportation adding habit strength to the theory of planned behavior. *Am. J. Prev. Med.* **2009**, *36*, 189–194.
48. De Cocker, K.; Cardon, G.; De Bourdeaudhuij, I. Pedometer-determined physical activity and its comparison with the international physical activity questionnaire in a sample of Belgian adults. *Res. Q. Exerc. Sport* **2007**, *78*, 429–437.
49. Dollman, J.; Lewis, N.R. Active transport to school as part of a broader habit of walking and cycling among south Australian youth. *Pediatr. Exerc. Sci.* **2007**, *19*, 436–443.
50. Dombois, O.T.; Braun-Fahrlander, C.; Martin-Diener, E. Comparison of adult physical activity levels in three Swiss alpine communities with varying access to motorized transportation. *Health Place* **2007**, *13*, 757–766.
51. Drygas, W.; Kwasniewska, M.; Kaleta, D.; Pikala, M.; Bielecki, W.; Gluszek, J.; Zdrojewski, T.; Pajak, A.; Kozakiewicz, K.; Broda, G. Epidemiology of physical inactivity in Poland: Prevalence and determinants in a former communist country in socioeconomic transition. *Public Health* **2009**, *123*, 592–597.
52. Ducheyne, F.; De Bourdeaudhuij, I.; Spittaels, H.; Cardon, G. Individual, social and physical environmental correlates of “never” and “always” cycling to school among 10 to 12 year old children living within a 3.0 km distance from school. *Int. J. Behav. Nutr. Phys. Act.* **2012**, *9*, doi:10.1186/1479-5868-9-142.
53. Duncan, E.K.; Scott Duncan, J.; Schofield, G. Pedometer-determined physical activity and active transport in girls. *Int. J. Behav. Nutr. Phys. Act.* **2008**, *5*, doi:10.1186/1479-5868-5-2.

54. Engbers, L.H.; Hendriksen, I.J.M. Characteristics of a population of commuter cyclists in the Netherlands: Perceived barriers and facilitators in the personal, social and physical environment. *Int. J. Behav. Nutr. Phys. Act.* **2010**, *7*, doi:10.1186/1479-5868-7-89.
55. Faulkner, G.; Stone, M.; Buliung, R.; Wong, B.; Mitra, R. School travel and children's physical activity: A cross-sectional study examining the influence of distance. *BMC Public Health* **2013**, *13*, doi:10.1186/1471-2458-13-1166.
56. Ferrar, K.; Olds, T.; Maher, C.; Maddison, R. Time use clusters of New Zealand adolescents are associated with weight status, diet and ethnicity. *Aust. N. Z. J. Public Health* **2013**, *37*, 39–46.
57. Ford, P.; Bailey, R.; Coleman, D.; Woolf-May, K.; Swaine, I. Activity levels, dietary energy intake, and body composition in children who walk to school. *Pediatr. Exerc. Sci.* **2007**, *19*, 393–407.
58. Freeman, L.; Neckerman, K.; Schwartz-Soicher, O.; Quinn, J.; Richards, C.; Bader, M.D.M.; Lovasi, G.; Jack, D.; Weiss, C.; Konty, K.; *et al.* Neighborhood walkability and active travel (walking and cycling) in New York city. *J. Urban Health* **2013**, *90*, 575–585.
59. Fulton, J.E.; Shisler, J.L.; Yore, M.M.; Caspersen, C.J. Active transportation to school: Findings from a national survey. *Res. Q. Exerc. Sport* **2005**, *76*, 352–357.
60. Furie, G.L.; Desai, M.M. Active transportation and cardiovascular disease risk factors in U.S. Adults. *Am. J. Prev. Med.* **2012**, *43*, 621–628.
61. Goodman, A.; Mackett, R.L.; Paskins, J. Activity compensation and activity synergy in British 8–13 year olds. *Prev. Med.* **2011**, *53*, 293–298.
62. Gordon-Larsen, P.; Nelson, M.C.; Beam, K. Associations among active transportation, physical activity, and weight status in young adults. *Obes. Res.* **2005**, *13*, 868–875.
63. Goodman, A.; Brand, C.; Ogilvie, D.; iConnect consortium. Associations of health, physical activity and weight status with motorised travel and transport carbon dioxide emissions: A cross-sectional, observational study. *Environ. Health* **2012**, *11*, doi:10.1186/1476-069X-11-52.
64. Grow, H.M.; Saelens, B.E.; Kerr, J.; Durant, N.H.; Norman, G.J.; Sallis, J.F. Where are youth active? Roles of proximity, active transport, and built environment. *Med. Sci. Sports Exerc.* **2008**, *40*, 2071–2079.
65. Harten, N.; Olds, T. Patterns of active transport in 11–12 year old Australian children. *Aust. N. Z. J. Public Health* **2004**, *28*, 167–172.
66. Hearst, M.O.; *et al.* The relationship of area-level sociodemographic characteristics, household composition and individual-level socioeconomic status on walking behavior among adults. *Transp. Res A Policy Pract.* **2013**, *50*, 149–157.
67. Heelan, K.A.; Donnelly, J.; Jacobsen, D.; Mayo, M.; Washburn, R.; Greene, L. Active commuting to and from school and bmi in elementary school children—Preliminary data. *Child Care Health Dev.* **2005**, *31*, 341–349.
68. Hohepa, M.; Schofield, G.; Kolt, G.S.; Scragg, R.; Garrett, N. Pedometer-determined physical activity levels of adolescents: Differences by age, sex, time of week, and transportation mode to school. *J. Phys. Act. Health* **2008**, *5*, S140–S152.
69. Johnson, T.G.; Brusseau, T.A.; Darst, P.W.; Kulinna, P.H.; White-Taylor, J. Step counts of non-white minority children and youth by gender, grade level, race/ethnicity, and mode of school transportation. *J. Phys. Act. Health* **2010**, *7*, 730–736.

70. King, A.C.; Parkinson, K.N.; Adamson, A.J.; Murray, L.; Besson, H.; Reilly, J.J.; Basterfield, L. Correlates of objectively measured physical activity and sedentary behavior in English children. *Eur. J. Public Health* **2011**, *21*, 424–431.
71. Kwasniewska, M.; Kaczmarczyk-Chalas, K.; Pikala, M.; Broda, G.; Kozakiewicz, K.; Pajak, A.; Tykarski, A.; Zdrojewski, T.; Drygas, W. Socio-demographic and lifestyle correlates of commuting activity in Poland. *Prev. Med.* **2010**, *50*, 257–261.
72. Kwasniewska, M.; Kaczmarczyk-Chalas, K.; Pikala, M.; Broda, G.; Kozakiewicz, K.; Pajak, A.; Tykarski, A.; Zdrojewski, T.; Drygas, W. Commuting physical activity and prevalence of metabolic disorders in Poland. *Prev. Med.* **2010**, *51*, 482–487.
73. Lachapelle, U.; Noland, R.B. Does the commute mode affect the frequency of walking behavior? The public transit link. *Transp. Policy* **2012**, *21*, 26–36.
74. Landsberg, B.; Plachta-Danielzik, S.; Much, D.; Johannsen, M.; Lange, D.; Mueller, M.J. Associations between active commuting to school, fat mass and lifestyle factors in adolescents: The kiel obesity prevention study (kops). *Eur. J. Clin. Nutr.* **2008**, *62*, 739–747.
75. Larouche, R.; Lloyd, M.; Knight, E.; Tremblay, M.S. Relationship between active school transport and body mass index in grades 4-to-6 children. *Pediatr. Exerc. Sci.* **2011**, *23*, 322–330.
76. Leslie, E.; Kremer, P.; Toumbourou, J.W.; Williams, J.W. Gender differences in personal, social and environmental influences on active travel to and from school for Australian adolescents. *J. Sci. Med. Sport* **2010**, *13*, 597–601.
77. Loucaides, C.A.; Plotnikoff, R.C.; Bercovitz, K. Differences in the correlates of physical activity between urban and rural Canadian youth. *J. Sch. Health* **2007**, *77*, 164–170.
78. Marques, E.A.; Pizarro, A.N.; Figueiredo, P.; Mota, J.; Santos, M.P. Modifiable lifestyle behavior patterns, sedentary time and physical activity contexts: A cluster analysis among middle school boys and girls in the salta study. *Prev. Med.* **2013**, *56*, 413–415.
79. Martin, S.L.; Lee, S.M.; Lowry, R. National prevalence and correlates of walking and bicycling to school. *Am. J. Prev. Med.* **2007**, *33*, 98–105.
80. Mendoza, J.A.; Watson, K.; Nguyen, N.; Cerin, E.; Baranowski, T.; Nicklas, T.A. Active commuting to school and association with physical activity and adiposity among US youth. *J. Phys. Act. Health* **2011**, *8*, 488–495.
81. Merom, D.; Miller, Y.D.; van der Ploeg, H.P.; Bauman, A. Predictors of initiating and maintaining active commuting to work using transport and public health perspectives in Australia. *Prev. Med.* **2008**, *47*, 342–346.
82. Metcalf, B.; Voss, L.; Jeffery, A.; Perkins, J.; Wilkin, T. Physical activity cost of the school run: Impact on schoolchildren of being driven to school (earlybird 22). *BMJ Br. Med. J.* **2004**, *329*, 832–833.
83. Molina-Garcia, J.; Castillo, I.; Sallis, J.F. Psychosocial and environmental correlates of active commuting for university students. *Prev. Med.* **2010**, *51*, 136–138.
84. Morckel, V.; Terzano, K. The influence of travel attitudes, commute mode choice, and perceived neighborhood characteristics on physical activity. *J. Phys. Act. Health* **2014**, *11*, 91–98.
85. Mota, J.; Ribeiro, J.C.; Carvalho, J.; Santos, M.P. The physical activity behaviors outside school and bmi in adolescents. *J. Phys. Act. Health* **2010**, *7*, 754–760.

86. Murtagh, E.M.; Murphy, M.H. Active travel to school and physical activity levels of Irish primary schoolchildren. *Pediatr. Exerc. Sci.* **2011**, *23*, 230–236.
87. Naumann, R.B.; Dellinger, A.M.; Anderson, M.L.; Bonomi, A.E.; Rivara, F.P.; Thompson, R.S. Preferred modes of travel among older adults: What factors affect the choice to walk instead of drive? *J. Saf. Res.* **2009**, *40*, 395–398.
88. Nilsson, A.; Andersen, L.B.; Ommundsen, Y.; Froberg, K.; Sardinha, L.B.; Piehl-Aulin, K.; Ekelund, U. Correlates of objectively assessed physical activity and sedentary time in children: A cross-sectional study (the European Youth Heart Study). *BMC Public Health* **2009**, *9*, doi:10.1186/1471-2458-9-322.
89. Oreskovic, N.M.; Sawicki, G.S.; Kinane, T.B.; Winickoff, J.P.; Perrin, J.M. Travel patterns to school among children with asthma. *Clin. Pediatr.* **2009**, *48*, 632–640.
90. Ostergaard, L.; Grontved, A.; Borrestad, L.A.B.; Froberg, K.; Gravesen, M.; Andersen, L.B. Cycling to school is associated with lower bmi and lower odds of being overweight or obese in a large population-based study of Danish adolescents. *J. Phys. Act. Health* **2012**, *9*, 617–625.
91. Ostergaard, L.; Kolle, E.; Steene-Johannessen, J.; Anderssen, S.A.; Andersen, L.B. Cross sectional analysis of the association between mode of school transportation and physical fitness in children and adolescents. *Int. J. Behav. Nutr. Phys. Act.* **2013**, *10*, doi:10.1186/1479-5868-10-91.
92. Owen, C.G.; Nightingale, C.M.; Rudnicka, A.R.; van Sluijs, E.M.F.; Ekelund, U.; Cook, D.G.; Whincup, P.H. Travel to school and physical activity levels in 9–10 year-old UK children of different ethnic origin; Child Heart and Health Study in England (CHASE). *PLoS One* **2012**, *7*, doi: 10.1371/journal.pone.0030932.
93. Pabayo, R.; Maximova, K.; Spence, J.C.; Vander Ploeg, K.; Wu, B.; Veugelers, P.J. The importance of active transportation to and from school for daily physical activity among children. *Prev. Med.* **2012**, *55*, 196–200.
94. Panter, J.; Jones, A.; Van Sluijs, E.; Griffin, S. The influence of distance to school on the associations between active commuting and physical activity. *Pediatr. Exerc. Sci.* **2011**, *23*, 72–86.
95. Rissel, C.; Mulley, C.; Ding, D. Travel mode and physical activity at Sydney university. *Int. J. Environ. Res. Public Health* **2013**, *10*, 3563–3577.
96. Robertson-Wilson, J.E.; Leatherdale, S.T.; Wong, S.L. Social-ecological correlates of active commuting to school among high school students. *J. Adolesc. Health* **2008**, *42*, 486–495.
97. Rosenberg, D.E.; Sallis, J.F.; Conway, T.L.; Cain, K.L.; McKenzie, T.L. Active transportation to school over 2 years in relation to weight status and physical activity. *Obesity* **2006**, *14*, 1771–1776.
98. Roth, M.A.; Millett, C.J.; Mindell, J.S. The contribution of active travel (walking and cycling) in children to overall physical activity levels: A national cross sectional study. *Prev. Med.* **2012**, *54*, 134–139.
99. Sahlqvist, S.; Goodman, A.; Cooper, A.R.; Ogilvie, D. Change in active travel and changes in recreational and total physical activity in adults: Longitudinal findings from the iconnect study. *Int. J. Behav. Nutr. Phys. Act.* **2013**, *10*, doi:10.1186/1479-5868-10-28.

100. Sahlqvist, S.; Song, Y.; Ogilvie, D. Is active travel associated with greater physical activity? The contribution of commuting and non-commuting active travel to total physical activity in adults. *Prev. Med.* **2012**, *55*, 206–211.
101. Sahlqvist, S.; Heesch, K.C. Characteristics of utility cyclists in Queensland, Australia: An examination of the associations between individual, social, and environmental factors and utility cycling. *J. Phys. Act. Health* **2012**, *9*, 818–828.
102. Saksvig, B.I.; Webber, L.S.; Elder, J.P.; Ward, D.; Evenson, K.R.; Dowda, M.; Chae, S.E.; Treuth, M.S. A cross-sectional and longitudinal study of travel by walking before and after school among eighth-grade girls. *J. Adolesc. Health* **2012**, *51*, 608–614.
103. Santos, M.P.; Oliveira, J.; Ribeiro, J.C.; Mota, J. Active travel to school, bmi and participation in organised and non-organised physical activity among Portuguese adolescents. *Prev. Med.* **2009**, *49*, 497–499.
104. Sayers, S.P.; LeMaster, J.W.; Thomas, I.M.; Petroski, G.F.; Ge, B. A walking school bus program impact on physical activity in elementary school children in Columbia, Missouri. *Amer. J. Prev. Med.* **2012**, *43*, S384–S389.
105. Schofield, G.; Badlands, H.; Oliver, M. Objectively-measured physical activity in New Zealand workers. *J. Sci. Med. Sport* **2005**, *8*, 143–151.
106. Sirard, J.R.; Riner, W.F., Jr.; McIver, K.L.; Pate, R.R. Physical activity and active commuting to elementary school. *Med. Sci. Sports Exerc.* **2005**, *37*, 2062–2069.
107. Sisson, S.B.; Tudor-Locke, C. Comparison of cyclists' and motorists' utilitarian physical activity at an urban university. *Prev. Med.* **2008**, *46*, 77–79.
108. Slingerland, M.; Borghouts, L.B.; Hesselink, M.K.C. Physical activity energy expenditure in dutch adolescents: Contribution of active transport to school, physical education, and leisure time activities. *J. Sch. Health* **2012**, *82*, 225–232.
109. Smith, L.; Sahlqvist, S.; Ogilvie, D.; Jones, A.; Corder, K.; Griffin, S.J.; van Sluijs, E. Is a change in mode of travel to school associated with a change in overall physical activity levels in children? Longitudinal results from the SPEEDY Study. *Int. J. Behav. Nutr. Phys. Act.* **2012**, *9*, doi:10.1186/1479-5868-9-134.
110. Smith, L.; Sahlqvist, S.; Ogilvie, D.; Jones, A.; Griffin, S.J.; van Sluijs, E. Is active travel to non-school destinations associated with physical activity in primary school children? *Prev. Med.* **2012**, *54*, 224–228.
111. Spinks, A.; Macpherson, A.; Bain, C.; McClure, R. Determinants of sufficient daily activity in Australian primary school children. *J. Paediatr. Child Health* **2006**, *42*, 674–679.
112. Sugiyama, T.; Merom, D.; Reeves, M.; Leslie, E.; Owen, N. Habitual active transport moderates the association of TV viewing time with body mass index. *J. Phys. Act. Health* **2010**, *7*, 11–16.
113. van Sluijs, E.M.; Fearne, V.A.; Mattocks, C.; Riddoch, C.; Griffin, S.J.; Ness, A. The contribution of active travel to children's physical activity levels: Cross-sectional results from the ALSPAC study. *Prev. Med.* **2009**, *48*, 519–524.
114. Voss, C.; Sandercock, G. Aerobic fitness and mode of travel to school in English schoolchildren. *Med. Sci. Sports Exerc.* **2010**, *42*, 281–287.

115. Wen, L.M.; Merom, D.; Rissel, C.; Simpson, J.M. Weight status, modes of travel to school and screen time: A cross-sectional survey of children aged 10–13 years in Sydney. *Health Promot. J. Austr.* **2010**, *21*, 57–63.
116. Yang, L.; Panter, J.; Griffin, S.J.; Ogilvie, D. Associations between active commuting and physical activity in working adults: Cross-sectional results from the commuting and health in Cambridge study. *Prev. Med.* **2012**, *55*, 453–457.
117. Yelavich, S.; Towns, C.; Burt, R.; Chow, K.; Donohue, R.; Sani, H.S.H.; Taylor, K.; Gray, A.; Eberhart-Phillips, J.; Reeder, A.I. Walking to school: Frequency and predictors among primary school children in Dunedin, New Zealand. *N. Z. Med. J.* **2008**, *121*, 51–58.
118. Chau, J.Y.; van der Ploeg, H.P.; Merom, D.; Chey, T.; Bauman, A.E. Cross-sectional associations between occupational and leisure-time sitting, physical activity and obesity in working adults. *Prev. Med.* **2012**, *54*, 195–200.
119. Dunton, G.F.; Berrigan, D.; Ballard-Barbash, R.; Graubard, B.; Atienza, A.A. Joint associations of physical activity and sedentary behaviors with body mass index: Results from a time use survey of us adults. *Int. J. Obes.* **2009**, *33*, 1427–1436.
120. Granzin, K.L.; Olsen, J.E. Characterizing participants in activities protecting the environment—A focus on donating, recycling, and conservation behaviors. *J. Public Policy Mark.* **1991**, *10*, 1–27.
121. Mota, J.; Gomes, H.; Almeida, M.; Ribeiro, J.C.; Carvalho, J.; Santos, M.P. Active versus passive transportation to school—differences in screen time, socio-economic position and perceived environmental characteristics in adolescent girls. *Ann. Hum. Biol.* **2007**, *34*, 273–282.
122. Wong, B.Y.M.; Faulkner, G.; Buliung, R.; Irving, H. Mode shifting in school travel mode: Examining the prevalence and correlates of active school transport in Ontario, Canada. *BMC Public Health* **2011**, *11*, doi:10.1186/1471-2458-11-618.
123. Wang, Y.; Tuomilehto, J.; Jousilahti, P.; Antikainen, R.; Mahonen, M.; Katzmarzyk, P.T.; Hu, G. Occupational, commuting, and leisure-time physical activity in relation to heart failure among finnish men and women. *J. Am. Coll. Cardiol.* **2010**, *56*, 1140–1148.
124. Besser, L.M.; Dannenberg, A.L. Walking to public transit steps to help meet physical activity recommendations. *Am. J. Prev. Med.* **2005**, *29*, 273–280.
125. Cerin, E.; Leslie, E.; du Toit, L.; Owen, N.; Frank, L.D. Destinations that matter: Associations with walking for transport. *Health Place* **2007**, *13*, 713–724.
126. Dolnicar, S.; Laesser, C.; Matus, K. Short-haul city travel is truly environmentally sustainable. *Tour. Manag.* **2010**, *31*, 505–512.
127. Edwards, R.D. Public transit, obesity, and medical costs: Assessing the magnitudes. *Prev. Med.* **2008**, *46*, 14–21.
128. Goetzke, F.; Rave, T. Bicycle use in Germany: Explaining differences between municipalities with social network effects. *Urban Stud.* **2011**, *48*, 427–437.
129. Lachapelle, U.; Frank, L.; Saelens, B.E.; Sallis, J.F.; Conway, T.L. Commuting by public transit and physical activity: Where you live, where you work, and how you get there. *J. Phys. Act. Health* **2011**, *8*, S72–S82.



130. Lachapelle, U.; Frank, L.D. Transit and health: Mode of transport, employer-sponsored public transit pass programs, and physical activity. *J. Public Health Policy* **2009**, *30*, S73–S94.
131. Lee, C. Environment and active living: The roles of health risk and economic factors. *Am. J. Health Promot.* **2007**, *21*, 293–304.
132. MacDonald, J.M.; Stokes, R.J.; Cohen, D.A.; Kofner, A.; Ridgeway, G.K. The effect of light rail transit on body mass index and physical activity. *Amer. J. Prev. Med.* **2010**, *39*, 105–112.
133. Moudon, A.V.; Chanam Lee, C.; Cheadle, A.D.; Collier, C.W.; Johnson, D.; Schmid, T.L.; Weather, R.D. Cycling and the built environment, a US perspective. *Transp Res. D Transp. Environ.* **2005**, *10*, 245–261.
134. Villanueva, K.; Giles-Corti, B.; McCormack, G. Achieving 10,000 steps: A comparison of public transport users and drivers in a university setting. *Prev. Med.* **2008**, *47*, 338–341.
135. Wasfi, R.A.; Ross, N.A.; El-Geneidy, A.M. Achieving recommended daily physical activity levels through commuting by public transportation: Unpacking individual and contextual influences. *Health Place* **2013**, *23*, 18–25.
136. Wener, R.E.; Evans, G.W. A morning stroll—levels of physical activity in car and mass transit commuting. *Environ. Behav.* **2007**, *39*, 62–74.
137. Fuller, D.; Cummins, S.; Matthews, S.A. Does transportation mode modify associations between distance to food store, fruit and vegetable consumption, and bmi in low-income neighborhoods? *Am. J. Clin. Nutr.* **2013**, *97*, 167–172.
138. Lemstra, M.; Rogers, M.; Thompson, A.; Moraros, J. Prevalence and correlates of physical activity within on-reserve first nations youth. *J. Phys. Act. Health* **2013**, *10*, 430–436.
139. Swanson, K.C.; McCormack, G.R. The relations between driving behavior, physical activity, and weight status among Canadian adults. *J. Phys. Act. Health* **2012**, *9*, 352–359.
140. Wen, L.; Orr, N.; Millett, C.; Rissel, C. Driving to work and overweight and obesity: Findings from the 2003 New South Wales Health Survey, Australia. *Int. J. Obes.* **2006**, *30*, 782–786.
141. Wennberg, P.; Wensley, F.; Johansson, L.; Boman, K.; Di Angelantonio, E.; Rumley, A.; Lowe, G.; Hallmans, G.; Jansson, J.-H. Reduced risk of myocardial infarction related to active commuting: Inflammatory and haemostatic effects are potential major mediating mechanisms. *Eur. J. Cardiovasc. Prev. Rehabil.* **2010**, *17*, 56–62.
142. Kesse-Guyot, E.; Peneau, S.; Mejean, C.; Szabo de Edelenyi, F.; Galan, P.; Hercberg, S.; Lairon, D. Profiles of organic food consumers in a large sample of french adults: Results from the Nutrinet-Sante cohort study. *PLoS One* **2013**, *8*, doi:10.1371/journal.pone.0076998.
143. Magnusson, M.K.; Arvola, A.; Hursti, U.-K.K.; Aberg, L.; Sjoden, P.-O. Choice of organic foods is related to perceived consequences for human health and to environmentally friendly behavior. *Appetite* **2003**, *40*, 109–117.
144. Miao, L.; Wei, W. Consumers' pro-environmental behavior and the underlying motivations: A comparison between household and hotel settings. *Int. J. Hospitality Manag.* **2013**, *32*, 102–112.
145. Nie, C.; Zepeda, L. Lifestyle segmentation of US food shoppers to examine organic and local food consumption. *Appetite* **2011**, *57*, 28–37.

146. Petersen, S.B.; Rasmussen, M.A.; Strom, M.; Halldorsson, T.I.; Olsen, S.F. Sociodemographic characteristics and food habits of organic consumers—A study from the Danish national birth cohort. *Public Health Nutr.* **2013**, *16*, 1810–1819.
147. Thøgersen, J.; Olander, F. To what degree are environmentally beneficial choices reflective of a general conservation stance? *Environ. Behav.* **2006**, *38*, 550–569.
148. Torjusen, H.; Brantsaeter, A.L.; Haugen, M.; Lieblein, G.; Stigum, H.; Roos, G.; Holmboe-Ottesen, G.; Meltzer, H.M. Characteristics associated with organic food consumption during pregnancy; data from a large cohort of pregnant women in Norway. *BMC Public Health* **2010**, *10*, doi:10.1186/1471-2458-10-775.
149. Torjusen, H.; Lieblein, G.; Naes, T.; Haugen, M.; Meltzer, H.M.; Brantsaeter, A.L. Food patterns and dietary quality associated with organic food consumption during pregnancy; data from a large cohort of pregnant women in Norway. *BMC Public Health* **2012**, *12*, doi:10.1186/1471-2458-12-612.
150. Burgess, C.P.; Johnston, F.H.; Berry, H.L.; McDonnell, J.; Yibarbuk, D.; Gunabarra, C.; Mileran, A.; Bailie, R.S. Healthy country, healthy people: The relationship between indigenous health status and “caring for country”. *Med. J. Australia* **2009**, *190*, 567–572.
151. Litt, J.S.; Soobader, M.J.; Turbin, M.S.; Hale, J.W.; Buchenau, M.; Marshall, J.A. The influence of social involvement, neighborhood aesthetics, and community garden participation on fruit and vegetable consumption. *Amer. J. Public Health* **2011**, *101*, 1466–1473.
152. MacMillan Uribe, A.L.; Winham, D.M.; Wharton, C.M. Community supported agriculture membership in Arizona. An exploratory study of food and sustainability behaviors. *Appetite* **2012**, *59*, 431–436.
153. Maples, M.; Morgan, K.L.; Interis, M.G.; Harri, A. Who buys food directly from producers in the southeastern United States? *J. Agric. Appl. Econ.* **2013**, *45*, 509–518.
154. Kamphuis, C.B.M.; Giskes, K.; de Bruijn, G.-J.; Wendel-Vos, W.; Brug, J.; van Lenthe, F.J. Environmental determinants of fruit and vegetable consumption among adults: A systematic review. *Br. J. Nutr.* **2006**, *96*, 620–635.
155. Baik, J.-Y.; Lee, H. Habitual plate-waste of 6- to 9-year-olds may not be associated with lower nutritional needs or taste acuity, but undesirable dietary factors. *Nutr. Res.* **2009**, *29*, 831–838.
156. Marlette, M.A.; Templeton, S.B.; Panemangalore, M. Food type, food preparation, and competitive food purchases impact school lunch plate waste by sixth-grade students. *J. Amer. Diet. Assoc.* **2005**, *105*, 1779–1782.
